# Supplementary material for: Psychological distress of residents in Kawauchi village, Fukushima Prefecture after the accident at Fukushima Daiichi Nuclear Power Station: the Fukushima Health Management Survey
Source: PeerJ. 2016 Aug 31;4:e2353. doi: 10.7717/peerj.2353 (PMC5012316; doi:10.7717/peerj.2353)
Supplement: Supplemental Information 1 [file peerj-04-2353-s001.xlsx]

## Sheet: Total
Sex	Subjective feeling about health	Hypertension	Diabetes mellitus	Hyperlipidemia	Cancer	Stroke	Heart disease	Mental illness	Anorexia	Feelings about sleep satisfaction	Hyperactivity	Smorking	Drinking	Bereavement caused by the disaster	Change of work	Age	K6	PCL
1	3	1	1	1	1	1	1	1	0	1	2	3	1	2	1	31	0	17
1	3	1	1	1	1	1	1	1	0	2	2	3	1	2	1	34	0	17
1	2	1	1	1	1	1	1	1	0	1	2	1	3	2	1	36	0	17
1	3	1	1	1	1	1	1	1	0	1	2	3	3	2	2	37	0	17
1	1	1	1	1	1	1	1	1	0	1	2	2	1	2	2	38	0	17
1	1	1	1	1	1	1	1	1	0	1	2	2	3	2	1	40	0	17
1	2	1	2	1	1	1	1	1	0	1	2	3	3	2	2	45	0	17
1	3	1	1	1	1	1	1	1	0	2	2	2	3	2	1	47	0	17
1	3	1	1	1	2	1	1	1	0	2	2	2	3	2	1	47	0	17
2	3	1	1	1	1	1	1	1	0	1	2	1	1	2	2	47	0	17
1	3	1	1	1	1	1	1	1	0	1	2	3	3	2	2	48	0	17
1	2	1	1	1	1	1	1	1	0	1	2	2	3	2	1	50	0	17
1	3	2	2	2	1	1	1	1	0	1	2	1	1	2	2	50	0	17
1	3	2	1	2	1	1	1	1	0	1	2	3	3	2	2	50	0	17
2	3	2	1	1	1	1	1	1	0	1	2	1	1	2	2	51	0	17
1	3	1	1	1	1	1	1	1	0	1	2	3	3	2	2	51	0	17
1	3	1	2	1	1	1	1	1	0	1	2	2	3	2	1	53	0	17
1	2	2	1	2	1	1	1	1	0	1	2	3	2	2	1	54	0	17
1	2	1	1	1	1	1	1	1	0	1	2	3	3	2	2	55	0	17
1	3	1	1	2	1	1	1	1	0	1	2	3	1	1	1	56	0	17
1	2	2	1	2	1	1	1	1	0	1	2	2	3	2	2	58	0	17
1	3	1	2	1	1	1	1	1	0	2	2	3	3	2	1	60	0	17
1	3	2	1	2	1	1	1	1	0	1	2	3	3	2	1	61	0	17
2	3	2	1	1	1	1	1	1	0	1	2	1	1	2	1	62	0	17
1	1	2	2	2	1	1	1	1	0	1	2	2	1	2	2	63	0	17
2	1	1	1	1	1	1	1	1	0	2	2	1	1	2	2	63	0	17
1	2	1	1	1	1	1	1	1	0	1	2	3	1	2	2	65	0	17
1	3	1	2	1	1	2	1	1	0	1	2	2	2	2	2	67	0	17
1	3	2	1	1	1	1	1	1	0	1	2	3	3	2	2	67	0	17
2	3	2	1	2	1	1	1	1	0	1	2	3	1	2	2	68	0	17
1	2	1	1	1	1	1	1	1	0	1	2	2	3	2	2	70	0	17
1	2	2	1	1	1	2	2	1	0	1	2	2	2	2	2	73	0	17
1	2	1	1	1	2	1	1	1	0	1	2	1	1	2	2	75	0	17
1	3	2	1	2	1	1	1	1	0	1	2	2	3	2	1	75	0	17
1	1	1	1	1	1	1	1	1	0	1	2	3	1	2	1	79	0	17
1	2	2	1	1	1	1	1	1	0	1	2	1	1	2	2	79	0	17
2	2	2	1	1	1	1	1	1	0	1	2	1	1	2	2	79	0	17
2	3	1	2	1	1	1	1	1	0	1	2	1	1	2	1	80	0	17
2	3	2	1	1	1	1	1	1	0	1	2	1	3	2	2	80	0	17
2	3	1	2	1	1	1	1	1	0	1	1	1	1	2	2	91	0	17
2	3	1	1	1	1	1	1	1	0	2	1	1	1	2	1	91	0	17
1	1	1	1	1	1	1	1	1	0	1	2	2	3	1	2	49	1	17
1	3	2	1	1	1	1	1	1	0	2	2	3	2	2	1	50	1	17
1	2	1	2	1	1	1	1	1	0	2	2	3	1	2	2	61	1	17
1	3	2	1	1	1	1	1	1	0	2	2	1	3	2	1	72	1	17
1	3	2	1	2	1	1	1	1	0	2	2	2	3	2	2	73	1	17
1	3	2	2	1	1	1	1	1	0	1	2	1	3	2	2	62	2	17
1	2	1	1	1	1	1	1	2	0	1	2	2	1	2	1	32	3	17
1	2	1	1	1	1	1	1	1	0	2	2	3	3	2	2	36	4	17
1	3	1	1	1	1	1	1	1	0	2	1	2	3	2	1	47	5	17
2	1	1	1	1	1	1	1	1	0	1	2	1	3	2	1	34	0	18
1	3	1	1	1	1	1	1	1	0	2	2	3	1	2	2	37	0	18
2	1	1	1	1	1	1	1	1	0	1	2	1	1	2	1	43	0	18
2	3	1	1	1	1	1	1	1	0	2	2	1	1	2	2	50	0	18
1	3	1	2	1	1	1	1	1	0	2	2	3	3	2	2	52	0	18
1	3	2	1	1	1	1	1	1	0	2	2	3	3	1	2	56	0	18
1	2	1	1	2	1	1	1	1	0	2	2	2	3	1	1	58	0	18
1	2	1	1	1	1	1	1	1	0	1	2	2	1	2	1	61	0	18
1	3	1	2	1	1	1	1	1	0	1	2	2	3	2	1	61	0	18
1	3	1	1	2	1	1	1	1	0	1	2	3	3	2	1	62	0	18
1	3	2	1	1	1	1	2	1	0	1	2	3	3	2	1	64	0	18
1	1	1	1	1	1	1	1	1	0	2	2	1	1	2	1	66	0	18
1	3	2	1	2	1	1	2	1	0	1	2	1	3	2	2	67	0	18
1	3	2	1	1	1	1	1	1	0	2	2	1	3	2	2	70	0	18
2	3	1	1	2	1	1	1	1	0	1	1	1	1	2	2	73	0	18
2	3	1	1	1	1	1	1	1	0	2	2	3	2	2	1	38	1	18
1	2	1	1	2	1	1	1	1	0	1	2	3	1	2	2	45	1	18
1	3	1	1	1	1	1	1	1	0	1	2	2	3	2	1	58	1	18
1	2	2	1	2	1	1	1	1	0	2	2	1	3	2	1	65	1	18
1	3	1	2	1	1	1	1	1	0	1	2	2	3	2	2	71	1	18
2	3	1	1	1	1	1	1	1	0	2	2	1	3	2	2	32	2	18
1	3	2	1	2	1	1	1	1	0	1	2	3	3	2	1	45	2	18
1	3	2	2	1	1	1	1	1	0	1	2	3	3	2	1	52	2	18
1	2	1	1	2	1	2	1	1	0	1	2	2	3	2	2	53	2	18
1	3	1	1	1	1	1	1	1	0	1	2	3	1	2	1	56	2	18
2	4	2	2	2	1	1	1	1	0	2	2	1	1	2	2	83	4	18
2	3	2	1	1	1	1	1	1	0	2	2	1	1	2	1	47	5	18
1	3	1	1	2	1	1	1	1	0	3	2	3	1	1	1	47	10	18
2	3	1	1	1	1	1	1	1	0	1	2	1	3	2	1	31	0	19
1	3	1	1	1	1	1	1	1	0	1	2	3	3	2	1	40	0	19
2	3	1	1	1	1	1	1	1	0	1	2	1	1	2	1	49	0	19
1	3	1	1	2	1	1	2	1	0	1	2	2	3	2	2	54	0	19
1	4	2	1	1	1	1	1	1	0	1	2	3	3	2	1	55	0	19
1	3	1	2	1	1	1	1	1	0	1	2	3	3	2	1	55	0	19
1	2	2	1	2	1	1	1	1	0	1	2	2	1	2	1	58	0	19
2	3	1	1	1	1	1	1	1	0	1	2	1	1	2	1	61	0	19
1	3	1	1	1	1	1	2	1	0	2	2	1	1	2	1	61	0	19
2	3	2	1	1	1	1	1	2	0	1	2	1	1	2	2	61	0	19
2	3	1	1	1	2	1	1	1	0	1	2	1	1	2	2	63	0	19
2	3	2	1	1	1	1	1	1	0	2	2	1	1	2	2	64	0	19
1	1	1	1	1	1	1	1	1	0	1	2	3	3	2	1	67	0	19
2	1	2	2	2	1	1	1	1	0	1	2	1	1	2	1	78	0	19
1	3	1	1	1	1	1	1	1	0	1	2	2	1	2	1	83	0	19
1	3	1	1	1	1	1	1	1	0	2	2	3	3	2	1	35	1	19
1	3	2	1	1	1	1	1	1	0	1	2	2	3	2	2	55	1	19
1	3	1	1	1	1	1	1	1	0	1	2	1	3	2	1	62	1	19
2	3	1	1	1	1	1	1	1	0	1	2	1	1	2	1	43	2	19
2	3	1	1	1	1	1	1	1	0	1	2	3	1	2	2	59	2	19
2	4	2	1	1	1	1	1	1	0	1	2	1	1	2	1	70	2	19
2	3	1	1	1	1	1	1	1	0	2	2	1	1	2	2	30	3	19
2	3	1	1	1	1	1	1	1	0	1	2	1	3	2	1	40	3	19
2	3	1	2	2	1	1	1	1	0	2	2	1	1	2	1	51	3	19
2	2	1	1	2	1	1	1	1	0	2	1	1	1	2	2	77	3	19
1	3	2	2	2	1	1	1	1	0	1	2	3	1	2	2	55	4	19
2	3	2	1	1	1	1	1	1	0	1	2	1	1	2	2	68	5	19
2	3	1	1	1	1	1	1	1	0	1	2	2	3	2	1	32	6	19
1	3	2	2	2	1	1	1	1	0	1	1	3	3	2	2	78	6	19
1	1	1	1	2	1	1	1	1	0	2	2	2	3	2	2	36	0	20
2	3	1	1	1	1	1	1	1	0	1	2	1	1	1	1	40	0	20
1	3	2	1	2	1	1	1	1	0	1	2	1	3	2	1	47	0	20
2	2	1	1	1	1	1	1	1	0	1	2	1	1	2	1	51	0	20
2	2	2	1	2	1	1	1	1	0	1	2	1	1	1	1	57	0	20
1	1	2	1	1	1	1	1	1	0	1	2	2	3	2	2	60	0	20
1	3	1	1	1	1	1	1	1	0	3	2	1	1	2	1	62	0	20
1	3	1	1	1	1	1	1	1	0	2	2	2	1	2	1	68	0	20
2	3	2	1	2	1	1	1	1	0	1	2	1	1	2	2	76	0	20
2	3	2	2	1	1	1	2	1	0	1	2	1	1	2	2	80	0	20
2	3	2	1	1	1	1	1	1	0	2	2	1	1	2	1	81	0	20
2	3	1	1	1	1	1	1	1	0	1	2	2	3	2	1	35	1	20
1	2	2	1	1	1	1	1	1	0	1	2	2	2	2	2	56	1	20
1	3	1	1	1	1	1	1	1	0	1	2	2	1	2	2	60	1	20
1	3	1	1	1	1	1	1	1	0	1	2	3	3	2	1	61	1	20
2	3	2	1	1	1	1	1	1	0	1	2	1	1	2	2	72	1	20
2	3	1	1	1	1	1	1	1	0	2	2	1	1	2	2	84	1	20
2	3	2	2	2	1	1	1	1	0	2	2	1	1	2	1	51	2	20
1	2	2	1	2	1	1	1	1	0	2	2	2	3	2	2	55	2	20
2	3	1	1	1	1	1	1	1	0	2	2	1	1	2	2	56	2	20
1	3	2	2	2	1	1	1	1	0	2	2	2	1	2	2	34	3	20
2	3	2	1	1	1	1	1	1	0	2	2	1	1	2	1	42	3	20
2	3	2	1	2	1	1	1	1	0	1	2	1	1	2	2	83	3	20
1	2	1	1	1	1	1	1	1	0	2	2	3	1	2	1	30	4	20
1	3	1	1	1	1	1	1	1	0	2	2	3	3	2	1	40	4	20
2	3	2	1	2	1	1	2	1	1	2	2	1	1	2	2	87	4	20
2	3	1	1	1	1	1	1	1	0	2	2	3	3	1	1	31	6	20
1	3	1	1	2	1	1	1	1	0	2	2	3	3	2	1	37	8	20
2	4	2	1	2	1	1	1	1	0	1	2	1	1	2	1	52	8	20
1	3	2	2	2	1	1	2	1	0	1	2	2	3	2	1	90	10	20
1	3	1	1	1	1	1	1	1	0	1	2	3	1	2	2	34	0	21
2	3	1	1	1	1	1	1	1	0	1	2	1	1	2	2	59	0	21
1	2	2	2	2	1	1	1	1	0	1	2	3	3	2	1	68	0	21
2	2	1	1	2	1	1	1	1	0	1	2	1	1	2	2	68	0	21
2	3	1	1	1	1	1	1	1	0	1	2	1	1	2	2	69	0	21
1	4	1	1	1	1	2	1	2	0	4	1	2	2	2	2	80	0	21
1	3	1	1	1	1	1	1	1	0	2	2	3	1	2	2	30	1	21
1	2	1	1	2	1	1	1	1	0	1	2	2	3	2	1	58	1	21
1	3	2	2	1	1	1	1	1	0	1	2	1	3	2	1	68	1	21
1	3	2	2	2	1	1	1	2	0	1	1	3	3	1	1	44	2	21
2	3	2	1	1	1	1	1	1	0	2	2	1	1	2	1	56	2	21
1	3	2	2	2	1	1	1	1	0	1	2	2	3	2	1	52	4	21
2	1	2	2	1	1	1	1	1	0	1	2	1	1	2	2	59	4	21
2	3	1	1	1	1	1	1	1	0	1	2	1	1	2	2	62	4	21
2	3	1	1	1	1	1	1	1	0	2	2	1	1	2	2	77	4	21
1	4	1	1	1	1	1	2	1	0	3	1	2	1	2	2	80	4	21
1	4	2	1	1	1	1	1	1	0	2	2	2	3	2	2	52	6	21
1	2	2	1	1	1	1	1	1	0	1	2	3	3	2	2	34	8	21
2	3	1	1	1	1	1	1	1	0	2	2	1	1	2	1	42	0	22
1	3	1	1	1	1	1	1	1	0	1	2	3	3	2	1	50	0	22
2	3	1	1	1	1	1	1	1	0	1	2	1	1	2	1	59	0	22
2	3	2	1	1	1	1	1	1	0	2	2	1	1	2	1	59	0	22
2	3	1	1	1	1	1	1	1	0	1	2	1	1	1	1	78	0	22
2	3	1	1	1	1	1	1	1	0	1	2	1	3	2	2	35	1	22
2	3	1	1	1	1	1	1	1	0	2	2	1	1	2	1	37	1	22
1	3	2	2	2	1	1	1	1	0	2	2	2	3	2	2	59	1	22
1	2	1	1	1	1	1	1	1	0	2	1	2	1	2	1	66	1	22
1	3	1	1	1	1	1	1	1	0	1	2	2	1	2	1	59	2	22
1	2	2	2	2	1	1	1	1	0	1	2	2	3	2	2	62	2	22
2	3	2	1	1	1	1	1	1	0	1	2	1	3	2	2	72	2	22
2	3	1	1	1	1	1	1	1	0	1	2	1	1	2	2	84	2	22
2	3	1	1	1	1	1	1	1	0	2	2	3	3	2	2	31	3	22
1	3	1	1	1	1	1	1	1	0	2	2	2	3	2	1	35	3	22
2	2	1	1	1	1	1	1	1	0	1	2	1	1	2	1	31	4	22
1	3	2	1	2	1	1	1	1	0	1	2	1	3	2	1	44	4	22
1	3	1	1	1	1	1	1	1	0	1	1	3	3	2	1	47	4	22
1	3	1	2	1	1	1	1	1	0	1	1	2	3	2	2	61	4	22
1	3	2	1	2	1	1	1	1	0	2	2	2	3	2	1	50	5	22
2	3	2	1	2	1	1	1	1	0	2	2	1	1	2	1	55	6	22
1	2	1	1	1	1	1	1	1	0	2	1	1	3	2	1	59	6	22
2	3	1	1	2	1	1	1	1	0	2	2	1	1	2	2	58	12	22
1	4	2	2	2	1	1	1	1	0	2	1	3	3	2	1	56	16	22
2	3	1	1	2	1	1	1	1	0	2	2	1	3	2	1	49	0	23
1	3	2	1	2	1	1	1	1	0	1	2	1	3	2	2	74	0	23
1	3	2	1	1	1	2	1	1	0	1	2	2	1	1	1	80	0	23
1	3	1	1	1	1	1	1	1	0	1	2	3	3	1	1	50	1	23
2	3	1	1	1	1	1	1	1	0	1	2	1	1	2	2	52	1	23
1	4	2	1	2	1	1	1	1	0	2	1	1	3	2	1	82	1	23
1	3	2	1	2	1	1	1	1	0	2	2	3	3	2	2	47	2	23
2	2	1	1	1	1	1	1	1	0	1	2	1	1	2	1	62	2	23
2	4	2	1	1	1	1	1	1	0	2	2	1	1	1	1	66	2	23
2	3	2	1	1	2	1	1	1	0	1	2	1	1	1	2	66	2	23
2	3	2	1	1	1	1	1	1	0	4	2	1	3	2	1	69	2	23
2	4	2	1	2	1	1	1	1	0	1	2	1	1	2	2	74	2	23
2	3	1	1	1	1	1	1	1	0	2	2	1	1	2	1	33	3	23
1	3	2	1	2	1	1	1	1	0	2	1	2	1	2	1	36	3	23
2	3	2	1	2	1	1	1	1	0	1	2	1	1	2	2	57	3	23
1	2	1	1	1	1	1	1	1	0	1	2	3	3	2	2	53	4	23
1	3	1	1	1	1	1	1	2	0	1	1	1	1	2	2	55	4	23
2	2	1	1	1	1	1	1	1	0	2	1	1	1	2	2	88	4	23
1	3	2	1	2	1	1	1	1	0	2	1	2	3	2	1	41	5	23
1	3	2	1	1	1	2	1	1	0	1	2	1	1	2	2	57	5	23
2	3	1	1	2	1	1	1	1	0	2	1	1	1	2	1	59	5	23
1	3	1	1	1	1	1	1	1	0	1	2	1	3	2	1	48	6	23
1	2	1	1	1	1	1	1	1	0	2	2	3	3	2	2	53	6	23
2	3	1	1	1	1	1	1	1	0	2	1	2	1	1	1	38	7	23
1	3	2	1	2	1	1	1	1	0	2	2	1	1	2	1	66	10	23
1	3	2	1	1	1	1	1	1	0	2	1	2	3	2	1	64	12	23
2	4	2	2	2	1	1	2	1	0	2	1	1	1	2	2	57	0	24
2	3	2	1	1	1	1	1	1	0	2	2	1	3	2	1	64	0	24
2	3	2	2	2	1	1	2	1	0	1	2	1	1	1	1	66	0	24
1	2	2	1	1	1	1	1	1	0	1	2	2	3	2	1	78	0	24
2	3	1	1	1	1	1	1	1	1	1	1	1	1	2	1	42	1	24
2	3	1	1	1	1	1	1	1	0	1	2	1	1	2	1	75	1	24
1	3	2	1	1	1	2	2	1	0	1	2	3	3	2	1	75	1	24
2	3	1	1	1	1	1	1	1	0	2	2	1	1	2	1	50	3	24
2	3	1	1	1	1	1	1	1	0	1	2	1	3	2	2	74	3	24
1	3	1	1	1	1	1	1	1	0	3	2	2	3	2	2	39	4	24
2	1	1	1	1	1	1	1	1	0	1	2	1	3	2	1	38	5	24
2	2	2	1	2	1	1	1	1	0	2	2	1	1	2	2	50	5	24
2	3	1	1	1	1	1	1	1	0	2	2	1	1	2	1	59	5	24
2	3	1	1	2	1	1	1	1	0	3	1	1	1	2	1	68	6	24
1	3	1	1	1	1	1	1	1	0	2	1	1	3	2	2	46	9	24
1	1	1	1	1	1	1	1	1	0	1	2	2	3	2	2	53	10	24
1	3	1	2	2	1	1	1	1	0	2	2	1	3	2	1	61	12	24
2	3	1	1	1	1	1	1	1	0	3	2	2	3	2	1	42	0	25
2	2	1	1	2	1	1	2	1	0	2	2	1	1	2	1	58	0	25
1	2	2	1	1	1	1	1	1	0	1	2	3	3	2	1	71	1	25
1	2	2	2	2	1	1	1	1	0	2	2	1	1	2	2	81	1	25
2	3	1	1	1	1	1	1	2	0	1	2	1	1	2	2	52	2	25
1	3	2	2	2	1	1	1	1	0	2	2	2	1	2	1	74	2	25
1	3	1	1	1	1	1	1	1	0	2	2	3	1	2	2	82	2	25
2	3	2	1	1	1	1	1	1	0	2	2	1	1	2	2	87	2	25
2	3	1	1	1	1	1	1	1	0	2	2	1	1	1	1	38	4	25
2	2	1	1	1	1	1	1	1	0	1	2	1	1	2	1	35	5	25
1	4	2	1	2	1	1	1	1	0	3	1	2	1	2	1	51	5	25
1	3	2	2	2	1	1	1	1	0	2	2	2	3	1	2	53	5	25
2	3	1	1	1	1	1	1	1	0	2	2	3	1	2	2	31	6	25
1	2	1	1	1	1	1	1	1	0	2	2	1	3	2	1	32	6	25
2	4	2	1	2	1	1	1	1	0	3	1	1	1	1	1	54	7	25
1	2	1	1	1	1	1	1	1	0	2	2	3	1	2	1	57	7	25
2	3	2	2	2	1	1	1	2	0	1	2	1	1	2	1	62	7	25
1	3	1	1	2	1	1	1	1	0	2	2	3	3	2	1	50	8	25
2	3	2	1	2	1	1	1	1	0	2	2	1	3	2	1	53	8	25
2	3	1	2	2	1	1	1	1	0	2	2	1	1	2	1	58	8	25
2	2	1	1	1	1	1	1	1	0	2	2	1	1	2	1	34	0	26
1	1	1	1	1	1	1	1	1	0	2	2	3	1	2	1	36	0	26
2	3	1	1	1	1	1	1	1	0	1	2	1	1	2	1	75	0	26
1	3	2	2	2	1	1	1	1	0	2	2	1	1	2	2	75	0	26
2	3	2	1	1	1	1	1	1	0	1	2	1	1	2	1	61	1	26
2	4	2	2	2	1	1	1	1	0	2	2	1	1	2	1	78	1	26
2	2	2	1	1	1	1	2	1	0	1	2	1	1	2	2	79	1	26
2	2	1	1	1	1	1	1	1	0	1	2	1	3	2	1	32	3	26
1	3	2	2	1	1	2	1	1	0	1	2	2	3	2	1	53	4	26
2	3	1	1	1	1	1	1	1	0	2	2	1	3	2	1	59	5	26
2	3	1	1	1	1	1	1	1	0	3	1	1	1	2	1	53	6	26
1	4	2	1	1	1	1	2	1	0	3	1	1	3	2	1	59	6	26
1	3	1	1	1	1	1	1	1	0	2	1	1	3	2	1	54	7	26
2	3	1	1	2	1	1	1	1	0	2	2	1	1	2	1	58	7	26
1	3	1	1	1	1	1	1	1	0	2	2	3	3	2	1	31	8	26
1	2	2	1	2	1	1	1	1	0	1	2	3	3	1	1	50	8	26
2	2	1	1	1	1	1	1	1	0	1	2	1	1	2	2	60	18	26
2	3	2	2	2	1	2	2	1	0	1	2	1	1	1	1	52	0	27
1	3	1	1	1	1	1	1	1	0	1	2	3	1	2	1	54	1	27
2	3	1	1	1	1	1	1	1	0	2	2	1	1	2	1	61	1	27
2	3	2	1	1	1	1	1	1	0	2	1	1	1	2	1	57	4	27
2	3	1	1	1	1	1	1	1	0	4	2	1	1	2	1	52	5	27
2	3	2	1	2	1	1	2	1	0	1	1	1	1	2	2	78	7	27
1	3	2	1	2	1	1	1	1	0	2	2	3	3	1	1	62	9	27
2	1	2	2	2	1	1	1	1	0	1	1	1	1	2	2	66	1	28
1	3	1	1	1	1	1	1	1	0	3	1	3	1	2	2	32	2	28
2	2	1	1	1	1	1	1	1	0	1	2	1	1	1	1	53	2	28
2	4	1	2	1	1	1	1	1	0	1	2	2	3	2	1	37	3	28
1	2	1	1	1	1	1	1	1	0	1	2	3	3	2	2	54	3	28
1	3	1	1	1	1	1	1	1	0	1	2	2	3	1	1	94	3	28
1	2	1	1	1	1	1	1	1	0	2	2	3	3	2	1	45	4	28
2	3	1	1	1	1	1	1	1	0	1	2	3	3	2	1	49	5	28
1	4	2	2	2	1	2	1	2	0	1	2	2	2	2	2	59	6	28
2	3	2	1	1	1	1	2	1	0	2	1	1	3	1	2	74	6	28
2	4	2	1	1	1	1	1	1	0	4	1	1	3	2	1	61	11	28
2	3	2	1	1	1	1	1	1	0	2	2	1	1	2	2	72	12	28
2	3	1	1	1	1	1	1	1	0	2	2	1	1	2	1	72	18	28
1	2	1	1	1	1	1	1	1	0	1	2	3	3	2	2	63	2	29
2	3	1	1	1	1	1	1	1	0	1	2	2	3	2	1	50	4	29
2	3	1	1	2	1	1	1	1	0	3	2	2	3	2	2	69	4	29
2	2	1	1	1	1	1	1	1	0	1	2	1	1	2	2	43	6	29
2	3	2	2	2	1	1	1	1	0	2	2	1	1	2	1	60	6	29
2	4	1	1	1	1	1	1	1	0	2	1	3	3	2	1	60	6	29
2	4	2	1	2	1	1	1	1	0	1	2	1	1	2	2	84	10	29
2	2	2	2	2	1	1	1	1	0	1	2	1	3	2	2	54	11	29
1	3	1	1	1	2	1	1	1	0	1	1	3	1	2	1	61	11	29
1	3	2	2	2	1	1	1	1	0	1	2	2	3	2	2	73	11	29
1	3	1	1	1	1	1	1	1	0	2	2	3	1	2	1	70	14	29
1	3	2	2	1	1	1	1	1	0	1	2	2	1	2	1	61	1	30
2	3	1	1	1	1	1	1	1	0	2	1	1	3	2	1	47	3	30
1	3	2	1	1	1	1	1	1	0	1	2	2	3	1	1	67	3	30
2	3	1	1	1	1	1	1	1	0	1	2	3	1	2	2	50	4	30
2	3	2	2	2	1	1	1	1	0	1	2	1	1	2	1	67	4	30
2	4	2	2	2	1	1	2	1	0	2	1	1	3	2	2	84	4	30
1	3	1	1	2	1	1	1	1	0	2	2	1	2	2	1	62	5	30
2	3	2	1	2	1	1	1	1	0	1	2	1	1	1	1	71	5	30
1	3	2	1	2	1	1	2	1	0	2	1	3	3	2	1	55	6	30
1	3	1	1	1	1	1	1	1	0	2	2	1	3	2	1	58	6	30
1	1	2	1	2	1	1	1	1	0	1	2	1	3	1	1	72	6	30
1	3	1	1	1	1	1	1	1	0	2	1	3	3	1	1	40	8	30
2	3	2	1	1	1	1	1	1	0	2	2	1	3	2	1	57	9	30
1	3	2	2	1	1	1	1	1	0	2	1	2	3	1	1	65	11	30
1	3	1	1	1	1	1	1	1	0	2	2	3	3	2	1	59	0	31
2	3	1	1	1	1	1	1	1	0	1	2	3	3	2	2	60	2	31
2	2	2	2	2	1	1	1	1	0	1	2	1	1	2	1	46	3	31
1	2	1	1	1	1	1	1	1	0	2	1	2	3	2	1	47	3	31
2	3	1	1	1	1	1	1	1	0	2	2	1	1	2	1	57	3	31
2	2	2	1	1	1	1	1	1	0	2	2	1	1	2	1	46	4	31
1	3	1	1	2	1	1	1	1	0	2	2	3	3	2	1	49	4	31
1	2	2	2	2	1	1	1	1	0	2	2	3	1	2	1	63	4	31
1	4	2	2	2	1	1	1	1	1	2	2	2	1	2	2	72	4	31
1	3	1	1	1	1	1	1	1	0	2	2	3	3	1	1	61	5	31
1	3	2	1	1	1	1	1	1	0	2	1	2	3	2	2	79	7	31
2	3	1	1	1	1	1	1	1	0	2	2	1	3	2	2	81	8	31
2	3	1	1	1	1	1	1	1	0	3	1	1	3	2	1	42	9	31
2	3	1	1	1	1	1	1	1	1	3	1	1	1	2	1	56	10	31
2	3	2	1	1	1	1	1	1	0	2	2	1	1	2	2	67	10	31
1	3	1	1	2	1	1	1	1	0	2	2	2	3	2	2	41	2	32
1	3	2	1	2	1	1	1	1	0	2	2	3	3	2	1	48	2	32
1	2	2	2	2	1	1	1	2	0	1	2	2	3	2	1	78	4	32
2	4	1	1	1	1	1	1	1	0	2	1	1	1	1	1	60	5	32
1	3	2	1	1	1	1	1	1	0	1	2	2	1	2	2	77	7	32
2	3	2	1	2	1	1	1	1	0	2	2	1	1	2	1	63	8	32
2	3	2	1	1	1	1	1	1	0	1	2	1	1	2	2	76	9	32
2	3	1	1	1	1	1	1	1	0	2	2	1	1	2	1	60	10	32
2	3	1	1	1	1	1	1	1	0	3	1	1	3	2	1	42	13	32
1	3	1	1	1	1	1	1	1	0	2	2	1	3	2	1	68	0	33
1	3	1	1	1	1	1	1	1	0	2	1	3	3	2	2	45	1	33
2	3	1	1	1	1	1	1	1	0	1	2	1	2	2	1	39	2	33
1	2	1	1	2	1	1	1	1	0	1	2	2	2	2	2	69	3	33
1	3	2	1	1	1	1	1	1	0	2	2	1	3	2	2	58	4	33
2	3	1	1	2	1	1	1	1	0	1	2	1	1	2	1	45	5	33
2	2	2	1	2	1	1	1	1	0	2	2	1	1	2	2	58	6	33
2	3	1	1	2	1	1	1	1	0	2	2	1	1	2	1	67	6	33
2	3	1	1	1	1	1	1	1	0	2	2	1	3	2	1	70	6	33
1	3	2	1	1	1	1	1	1	0	2	1	2	3	2	1	71	6	33
2	4	2	1	2	1	1	1	1	1	3	1	1	1	2	1	77	6	33
1	3	1	1	1	1	1	1	1	0	2	1	3	3	2	1	58	7	33
1	4	1	1	1	1	1	2	1	0	1	1	2	1	2	1	64	8	33
2	3	1	1	2	1	1	1	1	0	3	1	1	1	2	2	60	10	33
1	3	1	1	1	1	1	1	1	0	2	2	3	3	2	2	56	11	33
1	3	2	1	1	1	1	1	1	0	1	2	1	3	1	1	70	14	33
1	4	2	1	2	1	1	1	1	0	3	2	3	1	2	1	64	21	33
1	2	2	1	2	1	1	1	1	0	2	2	1	3	2	1	51	0	34
1	4	2	2	2	1	1	1	1	0	2	2	2	3	2	1	61	4	34
1	3	2	1	1	2	1	2	1	0	2	1	2	1	2	2	81	4	34
2	3	1	1	1	1	1	2	1	0	2	2	1	1	2	2	33	5	34
2	2	1	1	1	1	1	1	1	0	3	1	1	3	2	2	33	6	34
2	3	2	1	1	1	1	1	1	0	2	2	3	3	2	1	48	6	34
1	3	1	2	1	1	1	1	1	1	2	2	1	3	2	2	51	6	34
1	2	1	1	1	1	1	1	1	0	3	1	3	1	2	2	52	6	34
2	3	2	1	2	1	1	1	1	0	2	2	1	1	2	2	77	6	34
2	2	1	2	1	1	1	1	1	0	2	2	1	1	2	2	60	9	34
1	3	2	2	2	1	1	1	1	0	1	2	1	3	2	1	60	10	34
2	3	2	2	2	1	1	1	1	0	2	2	1	1	1	2	61	11	34
2	3	2	1	1	1	1	1	1	0	2	2	1	1	2	1	43	14	34
2	3	1	1	2	1	1	1	2	0	2	1	1	3	2	1	64	3	35
1	4	1	2	1	2	1	2	1	0	1	2	2	3	2	2	84	4	35
2	3	1	1	1	1	1	1	1	0	2	2	1	1	2	2	48	5	35
2	2	2	1	1	1	1	1	1	0	2	2	1	1	2	2	75	6	35
2	3	1	1	1	2	1	1	2	0	2	2	3	3	2	2	43	7	35
2	3	1	1	1	1	1	1	1	0	2	2	1	1	2	2	36	8	35
1	4	1	1	1	1	1	1	1	0	2	2	1	1	2	1	38	8	35
2	4	2	1	2	1	1	1	1	0	3	1	1	1	2	2	77	8	35
2	3	1	1	1	1	1	1	1	0	4	1	2	1	2	1	49	10	35
1	3	2	1	2	1	1	1	1	0	1	2	2	2	2	1	50	11	35
2	4	1	1	2	1	1	2	2	0	2	1	1	1	1	1	62	11	35
1	4	2	1	1	1	1	1	1	0	2	1	1	3	2	1	73	3	36
1	4	2	2	2	1	1	1	1	1	3	1	2	1	2	2	60	6	36
2	4	1	1	1	1	1	1	1	0	2	2	1	1	2	2	51	7	36
2	3	2	1	1	1	1	1	1	0	2	2	1	1	2	1	57	7	36
2	3	1	1	1	1	1	1	1	0	2	1	1	3	2	2	61	7	36
2	2	1	1	1	1	1	1	1	0	1	2	1	3	2	1	46	8	36
1	3	2	1	1	1	1	1	1	0	1	2	3	3	2	2	49	9	36
1	3	2	1	1	2	1	1	1	0	1	2	2	3	2	1	59	9	36
1	3	2	2	2	1	1	2	1	0	2	2	2	3	2	1	59	10	36
2	5	2	1	2	1	1	2	2	0	3	1	1	1	2	2	84	11	36
2	3	2	1	2	1	1	1	1	0	3	1	1	1	2	1	51	12	36
2	3	1	1	1	1	1	1	1	0	2	1	1	1	2	2	34	2	37
1	3	2	1	1	1	1	1	1	0	1	2	2	3	2	1	49	5	37
2	3	1	1	1	1	1	1	1	0	2	2	1	3	2	2	37	6	37
2	3	1	1	1	1	1	1	1	0	3	2	3	3	2	1	33	8	37
1	3	2	1	2	1	1	2	1	0	2	1	2	1	2	2	81	8	37
2	3	2	2	2	2	1	1	1	0	3	1	1	1	2	1	31	10	37
2	4	2	1	1	1	1	2	2	1	3	1	2	1	2	2	79	10	37
2	3	1	1	1	1	1	1	1	0	3	2	3	1	2	2	73	11	37
1	3	1	1	1	1	1	1	1	0	1	2	2	3	2	1	54	7	38
1	3	2	1	1	1	1	1	1	0	1	2	3	3	2	2	61	7	38
2	3	1	1	2	1	1	1	1	0	1	2	1	1	2	2	61	8	38
1	4	1	1	2	1	1	1	1	0	3	1	1	1	2	1	41	9	38
2	4	2	1	1	1	1	1	1	1	2	1	1	1	1	1	85	9	38
1	4	2	1	2	1	1	1	1	0	1	1	1	1	2	2	82	11	38
2	3	2	1	1	1	1	1	1	0	2	1	3	3	2	1	60	12	38
2	3	1	1	1	1	1	1	1	0	2	2	1	3	2	1	34	13	38
1	3	2	1	1	1	1	1	1	0	4	1	3	3	2	1	52	13	38
2	3	2	1	2	1	1	1	1	0	1	1	1	1	2	1	79	3	39
1	4	2	2	2	1	1	1	1	0	2	1	3	3	2	1	53	12	39
1	4	2	2	2	1	1	1	1	0	2	1	3	3	1	1	53	6	40
1	3	2	1	1	1	1	2	1	1	1	1	3	3	2	1	85	7	40
2	2	2	1	1	1	2	2	1	0	3	1	1	1	2	2	90	8	40
2	3	2	2	2	1	1	1	1	0	1	2	1	1	2	2	31	9	40
1	3	2	2	2	1	1	1	1	0	2	2	1	3	2	2	45	12	40
1	4	1	1	1	1	1	1	1	2	2	1	1	1	2	1	57	16	40
2	4	1	1	1	1	1	2	1	0	2	2	1	1	2	1	57	0	41
2	2	1	1	2	1	1	1	1	0	2	2	1	1	1	1	53	5	41
1	4	2	1	1	1	1	1	1	0	2	1	3	3	2	2	56	8	41
2	3	1	1	1	1	1	1	1	0	3	1	1	1	2	1	49	10	41
1	4	1	1	2	1	1	1	1	1	3	1	2	3	2	1	43	12	41
2	3	1	1	1	1	1	1	2	0	2	1	1	3	2	1	46	12	41
2	3	2	1	1	1	1	1	1	0	2	2	1	1	2	1	52	7	42
2	3	1	1	1	1	1	1	1	0	2	2	1	3	2	2	47	10	42
2	3	2	1	2	1	1	2	1	0	1	2	1	1	2	2	73	11	42
2	4	2	2	2	1	1	1	1	0	2	1	1	1	2	1	34	12	42
1	3	2	1	1	1	1	1	1	0	2	1	2	3	2	2	91	12	42
1	4	2	1	1	1	2	2	1	0	1	2	2	2	2	2	85	16	42
2	4	2	1	2	1	1	1	1	0	2	2	1	1	2	1	70	17	42
1	3	1	1	2	1	1	1	1	0	1	2	3	3	2	2	57	0	43
2	4	2	1	1	1	1	1	1	1	2	1	1	1	2	1	79	6	43
2	4	2	1	1	1	1	1	1	0	2	1	2	1	2	1	44	7	43
2	3	2	1	1	1	1	1	1	0	2	1	1	1	2	2	49	7	43
1	3	1	1	1	1	1	1	1	0	2	2	2	3	2	1	57	7	43
2	4	2	2	2	1	1	1	1	1	3	2	1	1	2	2	56	10	43
1	3	2	1	2	1	1	2	1	0	1	1	1	1	2	1	87	10	43
2	4	1	1	1	1	1	1	1	1	3	1	1	1	2	1	40	11	43
1	3	2	2	2	1	1	1	1	0	2	1	1	1	2	1	46	14	43
2	3	1	1	1	1	1	1	1	0	2	2	1	3	2	1	54	0	44
1	2	1	1	1	1	1	1	1	0	1	2	1	1	2	2	57	0	44
2	3	2	1	1	1	1	1	1	0	2	2	1	1	2	2	75	4	44
2	3	2	1	1	1	1	1	1	1	1	1	3	3	2	1	52	11	44
1	4	2	2	2	1	1	1	1	0	2	2	2	3	2	1	73	12	44
1	4	2	2	2	1	1	2	1	0	4	1	1	1	2	2	82	14	44
2	3	1	1	1	1	1	1	1	0	2	1	3	1	2	1	37	15	44
1	4	2	2	2	2	2	1	1	0	2	1	1	3	2	1	83	5	45
1	3	2	2	1	2	1	1	1	0	1	2	1	1	2	1	67	9	45
2	3	1	1	1	1	1	1	1	0	2	2	1	3	2	1	30	10	45
2	3	1	1	1	1	1	1	1	0	3	2	1	3	2	1	44	12	45
1	3	2	1	1	1	1	1	1	0	2	1	3	3	2	1	52	14	45
2	4	2	1	2	1	1	1	1	0	2	1	1	3	2	1	67	15	45
2	3	2	1	1	1	1	1	1	0	2	2	1	3	2	1	48	6	46
2	3	1	1	1	1	1	1	1	0	3	1	3	3	1	1	33	9	46
2	3	1	1	2	1	1	1	1	0	2	1	1	1	2	2	73	12	46
1	3	2	1	1	1	1	1	1	0	2	2	1	3	2	2	75	12	46
1	3	1	1	1	1	1	1	1	0	3	2	3	3	2	1	58	17	46
2	4	2	1	1	1	1	1	2	0	2	2	1	3	2	1	74	6	47
1	3	1	1	1	1	1	1	1	0	2	2	2	3	2	2	63	7	47
2	3	2	1	1	1	1	1	1	1	2	2	1	1	2	2	93	10	47
1	3	2	1	2	1	1	1	1	0	3	1	3	3	1	1	35	12	47
2	3	2	2	2	2	2	1	1	0	2	1	1	1	1	2	88	12	47
2	4	2	1	1	1	1	1	1	0	4	1	1	1	1	1	58	13	47
2	5	1	1	2	1	1	1	1	0	3	1	1	1	2	2	38	15	47
1	4	1	1	1	1	1	1	1	0	2	1	3	1	2	2	53	10	48
2	4	2	2	2	1	1	1	1	0	3	1	1	1	2	1	60	11	48
1	3	2	2	2	1	1	1	1	0	2	1	3	3	2	1	63	11	48
2	3	2	1	1	1	1	1	1	0	2	1	1	1	2	1	36	12	48
1	3	2	1	1	1	1	1	1	0	2	2	1	3	2	1	59	12	48
2	4	2	1	1	1	1	1	2	0	3	1	1	3	2	1	65	13	48
2	4	2	1	2	1	1	1	1	0	2	1	1	1	2	2	79	13	48
2	1	1	1	1	1	1	1	1	0	2	2	1	3	2	2	31	14	48
1	3	1	1	1	1	1	1	1	0	2	1	1	3	2	2	66	17	48
2	3	1	1	1	1	1	1	2	0	1	2	3	3	2	1	53	6	49
1	3	2	2	2	1	1	1	1	0	1	2	1	1	2	1	75	10	49
2	3	1	1	1	2	1	1	1	0	2	2	1	3	2	1	61	11	49
1	3	1	1	1	1	1	1	1	0	2	1	1	1	1	2	64	11	49
2	4	2	2	2	1	1	1	1	0	3	1	1	1	2	1	59	12	49
2	4	2	1	1	1	1	1	2	0	3	1	1	3	2	1	44	7	50
2	4	2	2	2	1	2	2	1	2	2	1	1	1	2	2	68	7	50
2	3	1	1	1	1	1	1	1	0	2	1	2	1	2	1	40	9	50
1	3	1	1	1	1	1	1	1	0	3	1	2	3	2	1	64	11	50
1	3	1	1	1	1	1	1	2	0	2	2	2	1	2	1	53	12	50
2	4	2	1	1	1	1	1	1	0	2	2	1	1	2	1	71	12	50
2	3	1	1	1	1	1	1	1	0	1	2	1	1	2	1	70	0	51
2	3	1	2	2	1	1	1	1	0	1	2	1	1	2	1	73	4	51
2	4	1	1	1	1	1	1	1	0	3	1	1	3	2	1	59	12	51
2	2	1	1	1	1	1	1	1	0	2	1	1	3	2	2	60	11	52
2	4	2	1	1	2	1	1	1	0	2	1	1	1	2	2	81	11	52
2	5	2	2	2	2	1	2	1	2	4	1	1	1	2	2	70	18	52
2	4	1	1	1	1	1	1	1	0	4	2	1	1	2	1	31	9	53
2	4	1	1	1	1	1	1	1	0	2	1	1	1	2	1	54	13	53
2	4	2	1	2	2	1	1	1	0	2	1	1	3	2	2	58	14	53
2	4	1	1	1	1	1	1	1	0	4	1	1	1	2	1	39	20	53
1	3	2	2	2	1	1	1	1	1	2	2	3	3	2	1	57	6	54
1	4	2	1	2	1	1	1	1	0	3	1	2	3	2	1	48	9	54
2	4	2	1	1	1	1	1	1	1	2	1	1	1	2	1	72	13	54
1	4	2	1	1	1	1	2	2	0	3	1	1	1	2	2	94	14	54
2	4	1	1	1	1	1	1	1	0	3	1	3	1	1	1	42	15	54
1	4	2	1	2	1	1	1	1	0	2	1	2	3	2	1	61	15	54
1	3	1	1	1	1	1	1	1	0	2	2	3	1	2	1	33	20	54
2	3	2	2	2	2	1	1	1	0	2	1	1	1	2	1	56	9	55
2	2	1	1	1	1	1	1	1	0	2	2	3	1	2	1	41	12	55
2	4	2	1	1	1	1	1	2	0	2	1	1	1	2	1	50	15	55
1	3	1	1	1	1	1	1	1	0	3	1	1	1	2	1	83	18	55
2	4	2	2	1	1	1	1	1	1	4	2	1	1	1	2	58	15	56
2	4	1	1	1	1	1	1	1	0	3	1	3	1	2	2	59	15	56
2	4	2	1	1	1	1	1	1	0	3	1	1	3	2	2	85	16	56
2	5	1	1	1	1	1	1	1	1	4	1	1	1	2	2	81	18	56
1	5	2	1	1	1	1	2	1	0	4	1	2	1	2	2	85	8	57
1	3	2	1	2	1	1	1	1	0	3	1	1	3	2	1	71	10	57
1	4	2	2	2	1	1	2	1	1	3	1	1	3	1	1	78	14	57
1	4	1	1	1	1	1	1	2	1	3	1	1	2	2	2	82	17	57
2	4	1	1	2	1	1	1	1	0	4	1	1	1	2	2	51	21	57
1	5	1	1	1	2	1	1	1	0	3	1	2	2	2	2	66	21	57
1	3	2	2	2	1	1	2	1	0	1	2	1	3	2	1	76	3	58
2	4	2	1	2	1	1	1	1	0	4	1	1	1	2	1	81	7	58
2	3	1	1	1	1	1	1	1	0	2	1	1	3	2	2	45	13	58
2	4	2	1	1	1	1	1	1	0	4	1	1	1	2	2	85	17	58
2	4	1	1	2	1	1	1	1	0	3	1	1	3	2	2	65	19	58
2	4	2	1	2	1	1	1	1	0	2	1	1	1	2	1	55	11	59
2	3	1	1	2	1	1	2	1	0	2	2	2	1	2	1	59	11	59
1	3	2	2	2	1	1	1	1	0	3	1	2	3	1	2	66	11	59
2	4	2	1	2	1	1	1	1	1	2	1	1	1	2	1	74	14	59
2	3	1	1	1	1	1	1	1	0	2	1	1	3	2	1	59	15	59
1	3	2	2	2	1	1	2	2	1	2	1	3	3	2	1	62	21	59
2	3	2	1	1	1	1	1	1	0	2	1	1	3	2	1	52	10	60
1	4	2	1	2	1	1	2	1	0	2	1	2	3	2	1	68	12	60
2	4	2	1	2	1	1	1	2	1	3	1	1	3	1	1	73	13	60
1	3	1	1	1	1	1	1	1	0	2	2	1	3	2	1	42	14	60
2	3	2	2	2	1	1	1	1	0	1	2	1	1	1	2	62	17	60
2	3	1	1	1	1	1	1	1	1	2	1	1	1	2	2	76	22	60
2	3	2	2	2	1	1	2	1	0	1	1	1	1	2	1	76	9	61
2	3	2	1	1	1	1	1	1	0	1	2	1	1	2	2	73	8	62
1	3	1	1	1	1	1	1	1	1	3	1	2	3	2	2	33	12	62
1	4	1	2	2	1	2	2	1	0	2	1	2	3	1	1	79	17	63
2	4	2	1	2	1	1	1	1	0	4	1	1	1	1	1	70	7	64
2	4	1	1	1	1	1	1	2	0	2	1	2	2	2	1	39	14	64
1	4	1	1	1	1	1	1	1	2	3	1	3	1	1	1	33	16	65
1	4	1	1	1	1	1	1	1	0	4	1	2	2	2	1	69	18	65
2	4	2	1	1	1	1	2	1	0	3	1	1	1	2	1	72	6	66
2	4	2	1	2	1	1	1	1	0	3	1	1	1	2	1	61	20	68
2	4	1	1	2	1	2	1	1	2	3	1	1	1	2	2	79	24	68
1	3	2	2	1	1	1	1	1	0	1	1	3	1	2	1	54	7	69
1	1	2	2	1	1	2	1	1	0	2	1	2	3	2	2	68	15	69
1	5	1	1	1	1	1	1	1	1	4	1	3	1	1	1	40	16	70
1	3	2	2	2	1	2	1	1	0	1	2	1	3	2	1	73	7	71
2	4	2	1	1	1	2	2	1	1	3	1	1	1	1	1	86	14	72
1	3	1	1	1	1	1	2	1	0	4	2	1	3	2	1	38	18	73
2	4	2	2	2	1	2	2	2	2	4	1	1	1	2	1	61	10	74
2	3	1	1	1	1	1	1	2	0	3	1	1	1	1	1	54	16	75
2	3	2	1	2	1	1	1	1	0	1	1	1	3	1	1	67	17	77
2	5	2	1	1	2	1	1	1	0	3	1	2	3	1	1	44	18	77
1	3	1	1	2	1	1	1	1	1	3	1	3	3	2	1	57	24	85
																58.4225
																14.8967

## Sheet: Male
sex	Subjective feeling about health	Hypertension	Diabetes mellitus	Hyperlipidemia	Cancer	Stroke	Heart disease	Mental illness	Anorexia	Feelings about sleep satisfaction	Hyperactivity	Smorking	Drinking	Bereavement caused by the disaster	Change of work	Age	K6	PCL
1	3	1	1	2	1	1	1	1	0	1	2	3	1	1	1	56	0	17			264
1	1	1	1	1	1	1	1	1	0	1	2	3	1	2	1	79	0	17		Age
1	3	1	1	1	1	1	1	1	0	1	2	3	1	2	1	31	0	17		30 years old	29
1	3	1	1	1	1	1	1	1	0	2	2	3	1	2	1	34	0	17		40 years old	36
1	2	2	1	2	1	1	1	1	0	1	2	3	2	2	1	54	0	17		50 years old	80
1	2	1	1	1	1	1	1	1	0	1	2	1	3	2	1	36	0	17		60 years old	61
1	1	1	1	1	1	1	1	1	0	1	2	2	3	2	1	40	0	17		70 years old	35
1	2	1	1	1	1	1	1	1	0	1	2	2	3	2	1	50	0	17		80years old	19
1	3	1	2	1	1	1	1	1	0	1	2	2	3	2	1	53	0	17		90 years old	4
1	3	2	1	2	1	1	1	1	0	1	2	2	3	2	1	75	0	17		Average age	58.3939
1	3	1	1	1	1	1	1	1	0	2	2	2	3	2	1	47	0	17		SD	14.0603
1	3	1	1	1	2	1	1	1	0	2	2	2	3	2	1	47	0	17
1	3	2	1	2	1	1	1	1	0	1	2	3	3	2	1	61	0	17
1	3	1	2	1	1	1	1	1	0	2	2	3	3	2	1	60	0	17
1	2	2	1	1	1	1	1	1	0	1	2	1	1	2	2	79	0	17
1	2	1	1	1	2	1	1	1	0	1	2	1	1	2	2	75	0	17
1	3	2	2	2	1	1	1	1	0	1	2	1	1	2	2	50	0	17
1	1	1	1	1	1	1	1	1	0	1	2	2	1	2	2	38	0	17
1	1	2	2	2	1	1	1	1	0	1	2	2	1	2	2	63	0	17			No	Yes
1	2	1	1	1	1	1	1	1	0	1	2	3	1	2	2	65	0	17		Hypertension	135	129
1	2	2	1	1	1	2	2	1	0	1	2	2	2	2	2	73	0	17		Diabetes mellitus	201	63
1	3	1	2	1	1	2	1	1	0	1	2	2	2	2	2	67	0	17		Hyperlipidemia	166	98
1	2	1	1	1	1	1	1	1	0	1	2	2	3	2	2	70	0	17		Cancer	255	9
1	2	2	1	2	1	1	1	1	0	1	2	2	3	2	2	58	0	17		Stroke	250	14
1	2	1	1	1	1	1	1	1	0	1	2	3	3	2	2	55	0	17		Heart disease	237	27
1	2	1	2	1	1	1	1	1	0	1	2	3	3	2	2	45	0	17		Mental illness	254	10
1	3	1	1	1	1	1	1	1	0	1	2	3	3	2	2	37	0	17		Anorexia	250	14
1	3	1	1	1	1	1	1	1	0	1	2	3	3	2	2	48	0	17		Hyperactivity	188	76
1	3	1	1	1	1	1	1	1	0	1	2	3	3	2	2	51	0	17		Smorking	165	99
1	3	2	1	1	1	1	1	1	0	1	2	3	3	2	2	67	0	17		Drinking	92	172
1	3	2	1	2	1	1	1	1	0	1	2	3	3	2	2	50	0	17		Change of work	103	161
1	1	1	1	1	1	1	1	1	0	1	2	2	3	1	2	49	1	17		Bereavement caused by the disaster	238	26
1	3	2	1	1	1	1	1	1	0	2	2	3	2	2	1	50	1	17		Subjective feeling about health	41	223
1	3	2	1	1	1	1	1	1	0	2	2	1	3	2	1	72	1	17		Feelings about sleep satisfaction	145	119
1	2	1	2	1	1	1	1	1	0	2	2	3	1	2	2	61	1	17
1	3	2	1	2	1	1	1	1	0	2	2	2	3	2	2	73	1	17			<13	≥13
1	3	2	2	1	1	1	1	1	0	1	2	1	3	2	2	62	2	17		N	236	28
1	2	1	1	1	1	1	1	2	0	1	2	2	1	2	1	32	3	17		%	89.3939	10.6061
1	2	1	1	1	1	1	1	1	0	2	2	3	3	2	2	36	4	17			<44	≥44
1	3	1	1	1	1	1	1	1	0	2	1	2	3	2	1	47	5	17		N	220	44
1	2	1	1	2	1	1	1	1	0	2	2	2	3	1	1	58	0	18		%	83.3333	16.6667
1	3	2	1	1	1	1	1	1	0	2	2	3	3	1	2	56	0	18
1	1	1	1	1	1	1	1	1	0	2	2	1	1	2	1	66	0	18
1	2	1	1	1	1	1	1	1	0	1	2	2	1	2	1	61	0	18
1	3	1	2	1	1	1	1	1	0	1	2	2	3	2	1	61	0	18
1	3	1	1	2	1	1	1	1	0	1	2	3	3	2	1	62	0	18
1	3	2	1	1	1	1	2	1	0	1	2	3	3	2	1	64	0	18
1	3	1	1	1	1	1	1	1	0	2	2	3	1	2	2	37	0	18
1	3	2	1	2	1	1	2	1	0	1	2	1	3	2	2	67	0	18
1	3	2	1	1	1	1	1	1	0	2	2	1	3	2	2	70	0	18
1	3	1	2	1	1	1	1	1	0	2	2	3	3	2	2	52	0	18
1	2	2	1	2	1	1	1	1	0	2	2	1	3	2	1	65	1	18
1	3	1	1	1	1	1	1	1	0	1	2	2	3	2	1	58	1	18
1	2	1	1	2	1	1	1	1	0	1	2	3	1	2	2	45	1	18
1	3	1	2	1	1	1	1	1	0	1	2	2	3	2	2	71	1	18
1	3	1	1	1	1	1	1	1	0	1	2	3	1	2	1	56	2	18
1	3	2	2	1	1	1	1	1	0	1	2	3	3	2	1	52	2	18
1	3	2	1	2	1	1	1	1	0	1	2	3	3	2	1	45	2	18
1	2	1	1	2	1	2	1	1	0	1	2	2	3	2	2	53	2	18
1	3	1	1	2	1	1	1	1	0	3	2	3	1	1	1	47	10	18
1	3	1	1	1	1	1	2	1	0	2	2	1	1	2	1	61	0	19
1	2	2	1	2	1	1	1	1	0	1	2	2	1	2	1	58	0	19
1	3	1	1	1	1	1	1	1	0	1	2	2	1	2	1	83	0	19
1	1	1	1	1	1	1	1	1	0	1	2	3	3	2	1	67	0	19
1	3	1	1	1	1	1	1	1	0	1	2	3	3	2	1	40	0	19
1	3	1	2	1	1	1	1	1	0	1	2	3	3	2	1	55	0	19
1	4	2	1	1	1	1	1	1	0	1	2	3	3	2	1	55	0	19
1	3	1	1	2	1	1	2	1	0	1	2	2	3	2	2	54	0	19
1	3	1	1	1	1	1	1	1	0	1	2	1	3	2	1	62	1	19
1	3	1	1	1	1	1	1	1	0	2	2	3	3	2	1	35	1	19
1	3	2	1	1	1	1	1	1	0	1	2	2	3	2	2	55	1	19
1	3	2	2	2	1	1	1	1	0	1	2	3	1	2	2	55	4	19
1	3	2	2	2	1	1	1	1	0	1	1	3	3	2	2	78	6	19
1	3	1	1	1	1	1	1	1	0	3	2	1	1	2	1	62	0	20
1	3	1	1	1	1	1	1	1	0	2	2	2	1	2	1	68	0	20
1	3	2	1	2	1	1	1	1	0	1	2	1	3	2	1	47	0	20
1	1	2	1	1	1	1	1	1	0	1	2	2	3	2	2	60	0	20
1	1	1	1	2	1	1	1	1	0	2	2	2	3	2	2	36	0	20
1	3	1	1	1	1	1	1	1	0	1	2	3	3	2	1	61	1	20
1	3	1	1	1	1	1	1	1	0	1	2	2	1	2	2	60	1	20
1	2	2	1	1	1	1	1	1	0	1	2	2	2	2	2	56	1	20
1	2	2	1	2	1	1	1	1	0	2	2	2	3	2	2	55	2	20
1	3	2	2	2	1	1	1	1	0	2	2	2	1	2	2	34	3	20
1	2	1	1	1	1	1	1	1	0	2	2	3	1	2	1	30	4	20
1	3	1	1	1	1	1	1	1	0	2	2	3	3	2	1	40	4	20
1	3	1	1	2	1	1	1	1	0	2	2	3	3	2	1	37	8	20
1	3	2	2	2	1	1	2	1	0	1	2	2	3	2	1	90	10	20
1	2	2	2	2	1	1	1	1	0	1	2	3	3	2	1	68	0	21
1	3	1	1	1	1	1	1	1	0	1	2	3	1	2	2	34	0	21
1	4	1	1	1	1	2	1	2	0	4	1	2	2	2	2	80	0	21
1	3	2	2	1	1	1	1	1	0	1	2	1	3	2	1	68	1	21
1	2	1	1	2	1	1	1	1	0	1	2	2	3	2	1	58	1	21
1	3	1	1	1	1	1	1	1	0	2	2	3	1	2	2	30	1	21
1	3	2	2	2	1	1	1	2	0	1	1	3	3	1	1	44	2	21
1	3	2	2	2	1	1	1	1	0	1	2	2	3	2	1	52	4	21
1	4	1	1	1	1	1	2	1	0	3	1	2	1	2	2	80	4	21
1	4	2	1	1	1	1	1	1	0	2	2	2	3	2	2	52	6	21
1	2	2	1	1	1	1	1	1	0	1	2	3	3	2	2	34	8	21
1	3	1	1	1	1	1	1	1	0	1	2	3	3	2	1	50	0	22
1	2	1	1	1	1	1	1	1	0	2	1	2	1	2	1	66	1	22
1	3	2	2	2	1	1	1	1	0	2	2	2	3	2	2	59	1	22
1	3	1	1	1	1	1	1	1	0	1	2	2	1	2	1	59	2	22
1	2	2	2	2	1	1	1	1	0	1	2	2	3	2	2	62	2	22
1	3	1	1	1	1	1	1	1	0	2	2	2	3	2	1	35	3	22
1	3	2	1	2	1	1	1	1	0	1	2	1	3	2	1	44	4	22
1	3	1	1	1	1	1	1	1	0	1	1	3	3	2	1	47	4	22
1	3	1	2	1	1	1	1	1	0	1	1	2	3	2	2	61	4	22
1	3	2	1	2	1	1	1	1	0	2	2	2	3	2	1	50	5	22
1	2	1	1	1	1	1	1	1	0	2	1	1	3	2	1	59	6	22
1	4	2	2	2	1	1	1	1	0	2	1	3	3	2	1	56	16	22
1	3	2	1	1	1	2	1	1	0	1	2	2	1	1	1	80	0	23
1	3	2	1	2	1	1	1	1	0	1	2	1	3	2	2	74	0	23
1	3	1	1	1	1	1	1	1	0	1	2	3	3	1	1	50	1	23
1	4	2	1	2	1	1	1	1	0	2	1	1	3	2	1	82	1	23
1	3	2	1	2	1	1	1	1	0	2	2	3	3	2	2	47	2	23
1	3	2	1	2	1	1	1	1	0	2	1	2	1	2	1	36	3	23
1	3	1	1	1	1	1	1	2	0	1	1	1	1	2	2	55	4	23
1	2	1	1	1	1	1	1	1	0	1	2	3	3	2	2	53	4	23
1	3	2	1	2	1	1	1	1	0	2	1	2	3	2	1	41	5	23
1	3	2	1	1	1	2	1	1	0	1	2	1	1	2	2	57	5	23
1	3	1	1	1	1	1	1	1	0	1	2	1	3	2	1	48	6	23
1	2	1	1	1	1	1	1	1	0	2	2	3	3	2	2	53	6	23
1	3	2	1	2	1	1	1	1	0	2	2	1	1	2	1	66	10	23
1	3	2	1	1	1	1	1	1	0	2	1	2	3	2	1	64	12	23
1	2	2	1	1	1	1	1	1	0	1	2	2	3	2	1	78	0	24
1	3	2	1	1	1	2	2	1	0	1	2	3	3	2	1	75	1	24
1	3	1	1	1	1	1	1	1	0	3	2	2	3	2	2	39	4	24
1	3	1	1	1	1	1	1	1	0	2	1	1	3	2	2	46	9	24
1	1	1	1	1	1	1	1	1	0	1	2	2	3	2	2	53	10	24
1	3	1	2	2	1	1	1	1	0	2	2	1	3	2	1	61	12	24
1	2	2	1	1	1	1	1	1	0	1	2	3	3	2	1	71	1	25
1	2	2	2	2	1	1	1	1	0	2	2	1	1	2	2	81	1	25
1	3	2	2	2	1	1	1	1	0	2	2	2	1	2	1	74	2	25
1	3	1	1	1	1	1	1	1	0	2	2	3	1	2	2	82	2	25
1	3	2	2	2	1	1	1	1	0	2	2	2	3	1	2	53	5	25
1	4	2	1	2	1	1	1	1	0	3	1	2	1	2	1	51	5	25
1	2	1	1	1	1	1	1	1	0	2	2	1	3	2	1	32	6	25
1	2	1	1	1	1	1	1	1	0	2	2	3	1	2	1	57	7	25
1	3	1	1	2	1	1	1	1	0	2	2	3	3	2	1	50	8	25
1	1	1	1	1	1	1	1	1	0	2	2	3	1	2	1	36	0	26
1	3	2	2	2	1	1	1	1	0	2	2	1	1	2	2	75	0	26
1	3	2	2	1	1	2	1	1	0	1	2	2	3	2	1	53	4	26
1	4	2	1	1	1	1	2	1	0	3	1	1	3	2	1	59	6	26
1	3	1	1	1	1	1	1	1	0	2	1	1	3	2	1	54	7	26
1	2	2	1	2	1	1	1	1	0	1	2	3	3	1	1	50	8	26
1	3	1	1	1	1	1	1	1	0	2	2	3	3	2	1	31	8	26
1	3	1	1	1	1	1	1	1	0	1	2	3	1	2	1	54	1	27
1	3	2	1	2	1	1	1	1	0	2	2	3	3	1	1	62	9	27
1	3	1	1	1	1	1	1	1	0	3	1	3	1	2	2	32	2	28
1	3	1	1	1	1	1	1	1	0	1	2	2	3	1	1	94	3	28
1	2	1	1	1	1	1	1	1	0	1	2	3	3	2	2	54	3	28
1	2	1	1	1	1	1	1	1	0	2	2	3	3	2	1	45	4	28
1	4	2	2	2	1	2	1	2	0	1	2	2	2	2	2	59	6	28
1	2	1	1	1	1	1	1	1	0	1	2	3	3	2	2	63	2	29
1	3	1	1	1	2	1	1	1	0	1	1	3	1	2	1	61	11	29
1	3	2	2	2	1	1	1	1	0	1	2	2	3	2	2	73	11	29
1	3	1	1	1	1	1	1	1	0	2	2	3	1	2	1	70	14	29
1	3	2	2	1	1	1	1	1	0	1	2	2	1	2	1	61	1	30
1	3	2	1	1	1	1	1	1	0	1	2	2	3	1	1	67	3	30
1	3	1	1	2	1	1	1	1	0	2	2	1	2	2	1	62	5	30
1	1	2	1	2	1	1	1	1	0	1	2	1	3	1	1	72	6	30
1	3	1	1	1	1	1	1	1	0	2	2	1	3	2	1	58	6	30
1	3	2	1	2	1	1	2	1	0	2	1	3	3	2	1	55	6	30
1	3	1	1	1	1	1	1	1	0	2	1	3	3	1	1	40	8	30
1	3	2	2	1	1	1	1	1	0	2	1	2	3	1	1	65	11	30
1	3	1	1	1	1	1	1	1	0	2	2	3	3	2	1	59	0	31
1	2	1	1	1	1	1	1	1	0	2	1	2	3	2	1	47	3	31
1	2	2	2	2	1	1	1	1	0	2	2	3	1	2	1	63	4	31
1	3	1	1	2	1	1	1	1	0	2	2	3	3	2	1	49	4	31
1	4	2	2	2	1	1	1	1	1	2	2	2	1	2	2	72	4	31
1	3	1	1	1	1	1	1	1	0	2	2	3	3	1	1	61	5	31
1	3	2	1	1	1	1	1	1	0	2	1	2	3	2	2	79	7	31
1	3	2	1	2	1	1	1	1	0	2	2	3	3	2	1	48	2	32
1	3	1	1	2	1	1	1	1	0	2	2	2	3	2	2	41	2	32
1	2	2	2	2	1	1	1	2	0	1	2	2	3	2	1	78	4	32
1	3	2	1	1	1	1	1	1	0	1	2	2	1	2	2	77	7	32
1	3	1	1	1	1	1	1	1	0	2	2	1	3	2	1	68	0	33
1	3	1	1	1	1	1	1	1	0	2	1	3	3	2	2	45	1	33
1	2	1	1	2	1	1	1	1	0	1	2	2	2	2	2	69	3	33
1	3	2	1	1	1	1	1	1	0	2	2	1	3	2	2	58	4	33
1	3	2	1	1	1	1	1	1	0	2	1	2	3	2	1	71	6	33
1	3	1	1	1	1	1	1	1	0	2	1	3	3	2	1	58	7	33
1	4	1	1	1	1	1	2	1	0	1	1	2	1	2	1	64	8	33
1	3	1	1	1	1	1	1	1	0	2	2	3	3	2	2	56	11	33
1	3	2	1	1	1	1	1	1	0	1	2	1	3	1	1	70	14	33
1	4	2	1	2	1	1	1	1	0	3	2	3	1	2	1	64	21	33
1	2	2	1	2	1	1	1	1	0	2	2	1	3	2	1	51	0	34
1	4	2	2	2	1	1	1	1	0	2	2	2	3	2	1	61	4	34
1	3	2	1	1	2	1	2	1	0	2	1	2	1	2	2	81	4	34
1	2	1	1	1	1	1	1	1	0	3	1	3	1	2	2	52	6	34
1	3	1	2	1	1	1	1	1	1	2	2	1	3	2	2	51	6	34
1	3	2	2	2	1	1	1	1	0	1	2	1	3	2	1	60	10	34
1	4	1	2	1	2	1	2	1	0	1	2	2	3	2	2	84	4	35
1	4	1	1	1	1	1	1	1	0	2	2	1	1	2	1	38	8	35
1	3	2	1	2	1	1	1	1	0	1	2	2	2	2	1	50	11	35
1	4	2	1	1	1	1	1	1	0	2	1	1	3	2	1	73	3	36
1	4	2	2	2	1	1	1	1	1	3	1	2	1	2	2	60	6	36
1	3	2	1	1	2	1	1	1	0	1	2	2	3	2	1	59	9	36
1	3	2	1	1	1	1	1	1	0	1	2	3	3	2	2	49	9	36
1	3	2	2	2	1	1	2	1	0	2	2	2	3	2	1	59	10	36
1	3	2	1	1	1	1	1	1	0	1	2	2	3	2	1	49	5	37
1	3	2	1	2	1	1	2	1	0	2	1	2	1	2	2	81	8	37
1	3	1	1	1	1	1	1	1	0	1	2	2	3	2	1	54	7	38
1	3	2	1	1	1	1	1	1	0	1	2	3	3	2	2	61	7	38
1	4	1	1	2	1	1	1	1	0	3	1	1	1	2	1	41	9	38
1	4	2	1	2	1	1	1	1	0	1	1	1	1	2	2	82	11	38
1	3	2	1	1	1	1	1	1	0	4	1	3	3	2	1	52	13	38
1	4	2	2	2	1	1	1	1	0	2	1	3	3	2	1	53	12	39
1	4	2	2	2	1	1	1	1	0	2	1	3	3	1	1	53	6	40
1	3	2	1	1	1	1	2	1	1	1	1	3	3	2	1	85	7	40
1	3	2	2	2	1	1	1	1	0	2	2	1	3	2	2	45	12	40
1	4	1	1	1	1	1	1	1	2	2	1	1	1	2	1	57	16	40
1	4	2	1	1	1	1	1	1	0	2	1	3	3	2	2	56	8	41
1	4	1	1	2	1	1	1	1	1	3	1	2	3	2	1	43	12	41
1	3	2	1	1	1	1	1	1	0	2	1	2	3	2	2	91	12	42
1	4	2	1	1	1	2	2	1	0	1	2	2	2	2	2	85	16	42
1	3	1	1	2	1	1	1	1	0	1	2	3	3	2	2	57	0	43
1	3	1	1	1	1	1	1	1	0	2	2	2	3	2	1	57	7	43
1	3	2	1	2	1	1	2	1	0	1	1	1	1	2	1	87	10	43
1	3	2	2	2	1	1	1	1	0	2	1	1	1	2	1	46	14	43
1	2	1	1	1	1	1	1	1	0	1	2	1	1	2	2	57	0	44
1	4	2	2	2	1	1	1	1	0	2	2	2	3	2	1	73	12	44
1	4	2	2	2	1	1	2	1	0	4	1	1	1	2	2	82	14	44
1	4	2	2	2	2	2	1	1	0	2	1	1	3	2	1	83	5	45
1	3	2	2	1	2	1	1	1	0	1	2	1	1	2	1	67	9	45
1	3	2	1	1	1	1	1	1	0	2	1	3	3	2	1	52	14	45
1	3	2	1	1	1	1	1	1	0	2	2	1	3	2	2	75	12	46
1	3	1	1	1	1	1	1	1	0	3	2	3	3	2	1	58	17	46
1	3	1	1	1	1	1	1	1	0	2	2	2	3	2	2	63	7	47
1	3	2	1	2	1	1	1	1	0	3	1	3	3	1	1	35	12	47
1	4	1	1	1	1	1	1	1	0	2	1	3	1	2	2	53	10	48
1	3	2	2	2	1	1	1	1	0	2	1	3	3	2	1	63	11	48
1	3	2	1	1	1	1	1	1	0	2	2	1	3	2	1	59	12	48
1	3	1	1	1	1	1	1	1	0	2	1	1	3	2	2	66	17	48
1	3	2	2	2	1	1	1	1	0	1	2	1	1	2	1	75	10	49
1	3	1	1	1	1	1	1	1	0	2	1	1	1	1	2	64	11	49
1	3	1	1	1	1	1	1	1	0	3	1	2	3	2	1	64	11	50
1	3	1	1	1	1	1	1	2	0	2	2	2	1	2	1	53	12	50
1	3	2	2	2	1	1	1	1	1	2	2	3	3	2	1	57	6	54
1	4	2	1	2	1	1	1	1	0	3	1	2	3	2	1	48	9	54
1	4	2	1	1	1	1	2	2	0	3	1	1	1	2	2	94	14	54
1	4	2	1	2	1	1	1	1	0	2	1	2	3	2	1	61	15	54
1	3	1	1	1	1	1	1	1	0	2	2	3	1	2	1	33	20	54
1	3	1	1	1	1	1	1	1	0	3	1	1	1	2	1	83	18	55
1	5	2	1	1	1	1	2	1	0	4	1	2	1	2	2	85	8	57
1	3	2	1	2	1	1	1	1	0	3	1	1	3	2	1	71	10	57
1	4	2	2	2	1	1	2	1	1	3	1	1	3	1	1	78	14	57
1	4	1	1	1	1	1	1	2	1	3	1	1	2	2	2	82	17	57
1	5	1	1	1	2	1	1	1	0	3	1	2	2	2	2	66	21	57
1	3	2	2	2	1	1	2	1	0	1	2	1	3	2	1	76	3	58
1	3	2	2	2	1	1	1	1	0	3	1	2	3	1	2	66	11	59
1	3	2	2	2	1	1	2	2	1	2	1	3	3	2	1	62	21	59
1	4	2	1	2	1	1	2	1	0	2	1	2	3	2	1	68	12	60
1	3	1	1	1	1	1	1	1	0	2	2	1	3	2	1	42	14	60
1	3	1	1	1	1	1	1	1	1	3	1	2	3	2	2	33	12	62
1	4	1	2	2	1	2	2	1	0	2	1	2	3	1	1	79	17	63
1	4	1	1	1	1	1	1	1	2	3	1	3	1	1	1	33	16	65
1	4	1	1	1	1	1	1	1	0	4	1	2	2	2	1	69	18	65
1	3	2	2	1	1	1	1	1	0	1	1	3	1	2	1	54	7	69
1	1	2	2	1	1	2	1	1	0	2	1	2	3	2	2	68	15	69
1	5	1	1	1	1	1	1	1	1	4	1	3	1	1	1	40	16	70
1	3	2	2	2	1	2	1	1	0	1	2	1	3	2	1	73	7	71
1	3	1	1	1	1	1	2	1	0	4	2	1	3	2	1	38	18	73
1	3	1	1	2	1	1	1	1	1	3	1	3	3	2	1	57	24	85

## Sheet: Female
sex	Subjective feeling about health	Hypertension	Diabetes mellitus	Hyperlipidemia	Cancer	Stroke	Heart disease	Mental illness	Anorexia	Feelings about sleep satisfaction	Hyperactivity	Smorking	Drinking	Bereavement caused by the disaster	Change of work	Age	K6	PCL
2	1	1	1	1	1	1	1	1	0	2	2	1	1	2	2	63	0	17			278
2	2	2	1	1	1	1	1	1	0	1	2	1	1	2	2	79	0	17		Age
2	3	2	1	1	1	1	1	1	0	1	2	1	1	2	1	62	0	17		30 years old	41
2	3	1	2	1	1	1	1	1	0	1	2	1	1	2	1	80	0	17		40 years old	40
2	3	1	2	1	1	1	1	1	0	1	1	1	1	2	2	91	0	17		50 years old	67
2	3	1	1	1	1	1	1	1	0	1	2	1	1	2	2	47	0	17		60 years old	53
2	3	2	1	1	1	1	1	1	0	1	2	1	1	2	2	51	0	17		70 years old	50
2	3	2	1	2	1	1	1	1	0	1	2	3	1	2	2	68	0	17		80years old	23
2	3	2	1	1	1	1	1	1	0	1	2	1	3	2	2	80	0	17		90 years old	4
2	3	1	1	1	1	1	1	1	0	2	1	1	1	2	1	91	0	17		Average age	58.4496
2	1	1	1	1	1	1	1	1	0	1	2	1	1	2	1	43	0	18		SD	15.6496
2	1	1	1	1	1	1	1	1	0	1	2	1	3	2	1	34	0	18
2	3	1	1	2	1	1	1	1	0	1	1	1	1	2	2	73	0	18
2	3	1	1	1	1	1	1	1	0	2	2	1	1	2	2	50	0	18
2	3	1	1	1	1	1	1	1	0	2	2	3	2	2	1	38	1	18
2	3	1	1	1	1	1	1	1	0	2	2	1	3	2	2	32	2	18
2	4	2	2	2	1	1	1	1	0	2	2	1	1	2	2	83	4	18
2	3	2	1	1	1	1	1	1	0	2	2	1	1	2	1	47	5	18
2	1	2	2	2	1	1	1	1	0	1	2	1	1	2	1	78	0	19			No	Yes
2	3	1	1	1	1	1	1	1	0	1	2	1	1	2	1	49	0	19		Hypertension	150	128
2	3	1	1	1	1	1	1	1	0	1	2	1	1	2	1	61	0	19		Diabetes mellitus	240	38
2	3	1	1	1	1	1	1	1	0	1	2	1	3	2	1	31	0	19		Hyperlipidemia	189	89
2	3	1	1	1	2	1	1	1	0	1	2	1	1	2	2	63	0	19		Cancer	267	11
2	3	2	1	1	1	1	1	2	0	1	2	1	1	2	2	61	0	19		Stroke	271	7
2	3	2	1	1	1	1	1	1	0	2	2	1	1	2	2	64	0	19		Heart disease	254	24
2	3	1	1	1	1	1	1	1	0	1	2	1	1	2	1	43	2	19		Mental illness	260	18
2	3	1	1	1	1	1	1	1	0	1	2	3	1	2	2	59	2	19		Anorexia	256	22
2	4	2	1	1	1	1	1	1	0	1	2	1	1	2	1	70	2	19		Hyperactivity	178	100
2	2	1	1	2	1	1	1	1	0	2	1	1	1	2	2	77	3	19		Smorking	256	22
2	3	1	1	1	1	1	1	1	0	1	2	1	3	2	1	40	3	19		Drinking	206	72
2	3	1	2	2	1	1	1	1	0	2	2	1	1	2	1	51	3	19		Change of work	113	165
2	3	1	1	1	1	1	1	1	0	2	2	1	1	2	2	30	3	19		Bereavement caused by the disaster	247	31
2	3	2	1	1	1	1	1	1	0	1	2	1	1	2	2	68	5	19		Subjective feeling about health	68	210
2	3	1	1	1	1	1	1	1	0	1	2	2	3	2	1	32	6	19		Feelings about sleep satisfaction	186	92
2	2	2	1	2	1	1	1	1	0	1	2	1	1	1	1	57	0	20
2	2	1	1	1	1	1	1	1	0	1	2	1	1	2	1	51	0	20			<13	≥13
2	3	1	1	1	1	1	1	1	0	1	2	1	1	1	1	40	0	20		N	238	40
2	3	2	1	2	1	1	1	1	0	1	2	1	1	2	2	76	0	20		%	85.6115	14.3885
2	3	2	2	1	1	1	2	1	0	1	2	1	1	2	2	80	0	20			<44	≥44
2	3	2	1	1	1	1	1	1	0	2	2	1	1	2	1	81	0	20		N	207	71
2	3	1	1	1	1	1	1	1	0	1	2	2	3	2	1	35	1	20		%	74.4604	25.5396
2	3	2	1	1	1	1	1	1	0	1	2	1	1	2	2	72	1	20
2	3	1	1	1	1	1	1	1	0	2	2	1	1	2	2	84	1	20
2	3	2	2	2	1	1	1	1	0	2	2	1	1	2	1	51	2	20
2	3	1	1	1	1	1	1	1	0	2	2	1	1	2	2	56	2	20
2	3	2	1	2	1	1	1	1	0	1	2	1	1	2	2	83	3	20
2	3	2	1	1	1	1	1	1	0	2	2	1	1	2	1	42	3	20
2	3	2	1	2	1	1	2	1	1	2	2	1	1	2	2	87	4	20
2	3	1	1	1	1	1	1	1	0	2	2	3	3	1	1	31	6	20
2	4	2	1	2	1	1	1	1	0	1	2	1	1	2	1	52	8	20
2	2	1	1	2	1	1	1	1	0	1	2	1	1	2	2	68	0	21
2	3	1	1	1	1	1	1	1	0	1	2	1	1	2	2	59	0	21
2	3	1	1	1	1	1	1	1	0	1	2	1	1	2	2	69	0	21
2	3	2	1	1	1	1	1	1	0	2	2	1	1	2	1	56	2	21
2	1	2	2	1	1	1	1	1	0	1	2	1	1	2	2	59	4	21
2	3	1	1	1	1	1	1	1	0	1	2	1	1	2	2	62	4	21
2	3	1	1	1	1	1	1	1	0	2	2	1	1	2	2	77	4	21
2	3	1	1	1	1	1	1	1	0	1	2	1	1	1	1	78	0	22
2	3	1	1	1	1	1	1	1	0	1	2	1	1	2	1	59	0	22
2	3	1	1	1	1	1	1	1	0	2	2	1	1	2	1	42	0	22
2	3	2	1	1	1	1	1	1	0	2	2	1	1	2	1	59	0	22
2	3	1	1	1	1	1	1	1	0	1	2	1	3	2	2	35	1	22
2	3	1	1	1	1	1	1	1	0	2	2	1	1	2	1	37	1	22
2	3	1	1	1	1	1	1	1	0	1	2	1	1	2	2	84	2	22
2	3	2	1	1	1	1	1	1	0	1	2	1	3	2	2	72	2	22
2	3	1	1	1	1	1	1	1	0	2	2	3	3	2	2	31	3	22
2	2	1	1	1	1	1	1	1	0	1	2	1	1	2	1	31	4	22
2	3	2	1	2	1	1	1	1	0	2	2	1	1	2	1	55	6	22
2	3	1	1	2	1	1	1	1	0	2	2	1	1	2	2	58	12	22
2	3	1	1	2	1	1	1	1	0	2	2	1	3	2	1	49	0	23
2	3	1	1	1	1	1	1	1	0	1	2	1	1	2	2	52	1	23
2	2	1	1	1	1	1	1	1	0	1	2	1	1	2	1	62	2	23
2	3	2	1	1	2	1	1	1	0	1	2	1	1	1	2	66	2	23
2	3	2	1	1	1	1	1	1	0	4	2	1	3	2	1	69	2	23
2	4	2	1	2	1	1	1	1	0	1	2	1	1	2	2	74	2	23
2	4	2	1	1	1	1	1	1	0	2	2	1	1	1	1	66	2	23
2	3	2	1	2	1	1	1	1	0	1	2	1	1	2	2	57	3	23
2	3	1	1	1	1	1	1	1	0	2	2	1	1	2	1	33	3	23
2	2	1	1	1	1	1	1	1	0	2	1	1	1	2	2	88	4	23
2	3	1	1	2	1	1	1	1	0	2	1	1	1	2	1	59	5	23
2	3	1	1	1	1	1	1	1	0	2	1	2	1	1	1	38	7	23
2	3	2	2	2	1	1	2	1	0	1	2	1	1	1	1	66	0	24
2	3	2	1	1	1	1	1	1	0	2	2	1	3	2	1	64	0	24
2	4	2	2	2	1	1	2	1	0	2	1	1	1	2	2	57	0	24
2	3	1	1	1	1	1	1	1	1	1	1	1	1	2	1	42	1	24
2	3	1	1	1	1	1	1	1	0	1	2	1	1	2	1	75	1	24
2	3	1	1	1	1	1	1	1	0	1	2	1	3	2	2	74	3	24
2	3	1	1	1	1	1	1	1	0	2	2	1	1	2	1	50	3	24
2	1	1	1	1	1	1	1	1	0	1	2	1	3	2	1	38	5	24
2	2	2	1	2	1	1	1	1	0	2	2	1	1	2	2	50	5	24
2	3	1	1	1	1	1	1	1	0	2	2	1	1	2	1	59	5	24
2	3	1	1	2	1	1	1	1	0	3	1	1	1	2	1	68	6	24
2	2	1	1	2	1	1	2	1	0	2	2	1	1	2	1	58	0	25
2	3	1	1	1	1	1	1	1	0	3	2	2	3	2	1	42	0	25
2	3	1	1	1	1	1	1	2	0	1	2	1	1	2	2	52	2	25
2	3	2	1	1	1	1	1	1	0	2	2	1	1	2	2	87	2	25
2	3	1	1	1	1	1	1	1	0	2	2	1	1	1	1	38	4	25
2	2	1	1	1	1	1	1	1	0	1	2	1	1	2	1	35	5	25
2	3	1	1	1	1	1	1	1	0	2	2	3	1	2	2	31	6	25
2	3	2	2	2	1	1	1	2	0	1	2	1	1	2	1	62	7	25
2	4	2	1	2	1	1	1	1	0	3	1	1	1	1	1	54	7	25
2	3	1	2	2	1	1	1	1	0	2	2	1	1	2	1	58	8	25
2	3	2	1	2	1	1	1	1	0	2	2	1	3	2	1	53	8	25
2	2	1	1	1	1	1	1	1	0	2	2	1	1	2	1	34	0	26
2	3	1	1	1	1	1	1	1	0	1	2	1	1	2	1	75	0	26
2	2	2	1	1	1	1	2	1	0	1	2	1	1	2	2	79	1	26
2	3	2	1	1	1	1	1	1	0	1	2	1	1	2	1	61	1	26
2	4	2	2	2	1	1	1	1	0	2	2	1	1	2	1	78	1	26
2	2	1	1	1	1	1	1	1	0	1	2	1	3	2	1	32	3	26
2	3	1	1	1	1	1	1	1	0	2	2	1	3	2	1	59	5	26
2	3	1	1	1	1	1	1	1	0	3	1	1	1	2	1	53	6	26
2	3	1	1	2	1	1	1	1	0	2	2	1	1	2	1	58	7	26
2	2	1	1	1	1	1	1	1	0	1	2	1	1	2	2	60	18	26
2	3	2	2	2	1	2	2	1	0	1	2	1	1	1	1	52	0	27
2	3	1	1	1	1	1	1	1	0	2	2	1	1	2	1	61	1	27
2	3	2	1	1	1	1	1	1	0	2	1	1	1	2	1	57	4	27
2	3	1	1	1	1	1	1	1	0	4	2	1	1	2	1	52	5	27
2	3	2	1	2	1	1	2	1	0	1	1	1	1	2	2	78	7	27
2	1	2	2	2	1	1	1	1	0	1	1	1	1	2	2	66	1	28
2	2	1	1	1	1	1	1	1	0	1	2	1	1	1	1	53	2	28
2	4	1	2	1	1	1	1	1	0	1	2	2	3	2	1	37	3	28
2	3	1	1	1	1	1	1	1	0	1	2	3	3	2	1	49	5	28
2	3	2	1	1	1	1	2	1	0	2	1	1	3	1	2	74	6	28
2	4	2	1	1	1	1	1	1	0	4	1	1	3	2	1	61	11	28
2	3	2	1	1	1	1	1	1	0	2	2	1	1	2	2	72	12	28
2	3	1	1	1	1	1	1	1	0	2	2	1	1	2	1	72	18	28
2	3	1	1	1	1	1	1	1	0	1	2	2	3	2	1	50	4	29
2	3	1	1	2	1	1	1	1	0	3	2	2	3	2	2	69	4	29
2	2	1	1	1	1	1	1	1	0	1	2	1	1	2	2	43	6	29
2	3	2	2	2	1	1	1	1	0	2	2	1	1	2	1	60	6	29
2	4	1	1	1	1	1	1	1	0	2	1	3	3	2	1	60	6	29
2	4	2	1	2	1	1	1	1	0	1	2	1	1	2	2	84	10	29
2	2	2	2	2	1	1	1	1	0	1	2	1	3	2	2	54	11	29
2	3	1	1	1	1	1	1	1	0	2	1	1	3	2	1	47	3	30
2	3	2	2	2	1	1	1	1	0	1	2	1	1	2	1	67	4	30
2	3	1	1	1	1	1	1	1	0	1	2	3	1	2	2	50	4	30
2	4	2	2	2	1	1	2	1	0	2	1	1	3	2	2	84	4	30
2	3	2	1	2	1	1	1	1	0	1	2	1	1	1	1	71	5	30
2	3	2	1	1	1	1	1	1	0	2	2	1	3	2	1	57	9	30
2	3	1	1	1	1	1	1	1	0	1	2	3	3	2	2	60	2	31
2	2	2	2	2	1	1	1	1	0	1	2	1	1	2	1	46	3	31
2	3	1	1	1	1	1	1	1	0	2	2	1	1	2	1	57	3	31
2	2	2	1	1	1	1	1	1	0	2	2	1	1	2	1	46	4	31
2	3	1	1	1	1	1	1	1	0	2	2	1	3	2	2	81	8	31
2	3	1	1	1	1	1	1	1	0	3	1	1	3	2	1	42	9	31
2	3	2	1	1	1	1	1	1	0	2	2	1	1	2	2	67	10	31
2	3	1	1	1	1	1	1	1	1	3	1	1	1	2	1	56	10	31
2	4	1	1	1	1	1	1	1	0	2	1	1	1	1	1	60	5	32
2	3	2	1	2	1	1	1	1	0	2	2	1	1	2	1	63	8	32
2	3	2	1	1	1	1	1	1	0	1	2	1	1	2	2	76	9	32
2	3	1	1	1	1	1	1	1	0	2	2	1	1	2	1	60	10	32
2	3	1	1	1	1	1	1	1	0	3	1	1	3	2	1	42	13	32
2	3	1	1	1	1	1	1	1	0	1	2	1	2	2	1	39	2	33
2	3	1	1	2	1	1	1	1	0	1	2	1	1	2	1	45	5	33
2	2	2	1	2	1	1	1	1	0	2	2	1	1	2	2	58	6	33
2	3	1	1	2	1	1	1	1	0	2	2	1	1	2	1	67	6	33
2	3	1	1	1	1	1	1	1	0	2	2	1	3	2	1	70	6	33
2	4	2	1	2	1	1	1	1	1	3	1	1	1	2	1	77	6	33
2	3	1	1	2	1	1	1	1	0	3	1	1	1	2	2	60	10	33
2	3	1	1	1	1	1	2	1	0	2	2	1	1	2	2	33	5	34
2	2	1	1	1	1	1	1	1	0	3	1	1	3	2	2	33	6	34
2	3	2	1	1	1	1	1	1	0	2	2	3	3	2	1	48	6	34
2	3	2	1	2	1	1	1	1	0	2	2	1	1	2	2	77	6	34
2	2	1	2	1	1	1	1	1	0	2	2	1	1	2	2	60	9	34
2	3	2	2	2	1	1	1	1	0	2	2	1	1	1	2	61	11	34
2	3	2	1	1	1	1	1	1	0	2	2	1	1	2	1	43	14	34
2	3	1	1	2	1	1	1	2	0	2	1	1	3	2	1	64	3	35
2	3	1	1	1	1	1	1	1	0	2	2	1	1	2	2	48	5	35
2	2	2	1	1	1	1	1	1	0	2	2	1	1	2	2	75	6	35
2	3	1	1	1	2	1	1	2	0	2	2	3	3	2	2	43	7	35
2	3	1	1	1	1	1	1	1	0	2	2	1	1	2	2	36	8	35
2	4	2	1	2	1	1	1	1	0	3	1	1	1	2	2	77	8	35
2	3	1	1	1	1	1	1	1	0	4	1	2	1	2	1	49	10	35
2	4	1	1	2	1	1	2	2	0	2	1	1	1	1	1	62	11	35
2	3	2	1	1	1	1	1	1	0	2	2	1	1	2	1	57	7	36
2	3	1	1	1	1	1	1	1	0	2	1	1	3	2	2	61	7	36
2	4	1	1	1	1	1	1	1	0	2	2	1	1	2	2	51	7	36
2	2	1	1	1	1	1	1	1	0	1	2	1	3	2	1	46	8	36
2	5	2	1	2	1	1	2	2	0	3	1	1	1	2	2	84	11	36
2	3	2	1	2	1	1	1	1	0	3	1	1	1	2	1	51	12	36
2	3	1	1	1	1	1	1	1	0	2	1	1	1	2	2	34	2	37
2	3	1	1	1	1	1	1	1	0	2	2	1	3	2	2	37	6	37
2	3	1	1	1	1	1	1	1	0	3	2	3	3	2	1	33	8	37
2	3	2	2	2	2	1	1	1	0	3	1	1	1	2	1	31	10	37
2	4	2	1	1	1	1	2	2	1	3	1	2	1	2	2	79	10	37
2	3	1	1	1	1	1	1	1	0	3	2	3	1	2	2	73	11	37
2	3	1	1	2	1	1	1	1	0	1	2	1	1	2	2	61	8	38
2	4	2	1	1	1	1	1	1	1	2	1	1	1	1	1	85	9	38
2	3	2	1	1	1	1	1	1	0	2	1	3	3	2	1	60	12	38
2	3	1	1	1	1	1	1	1	0	2	2	1	3	2	1	34	13	38
2	3	2	1	2	1	1	1	1	0	1	1	1	1	2	1	79	3	39
2	2	2	1	1	1	2	2	1	0	3	1	1	1	2	2	90	8	40
2	3	2	2	2	1	1	1	1	0	1	2	1	1	2	2	31	9	40
2	4	1	1	1	1	1	2	1	0	2	2	1	1	2	1	57	0	41
2	2	1	1	2	1	1	1	1	0	2	2	1	1	1	1	53	5	41
2	3	1	1	1	1	1	1	1	0	3	1	1	1	2	1	49	10	41
2	3	1	1	1	1	1	1	2	0	2	1	1	3	2	1	46	12	41
2	3	2	1	1	1	1	1	1	0	2	2	1	1	2	1	52	7	42
2	3	1	1	1	1	1	1	1	0	2	2	1	3	2	2	47	10	42
2	3	2	1	2	1	1	2	1	0	1	2	1	1	2	2	73	11	42
2	4	2	2	2	1	1	1	1	0	2	1	1	1	2	1	34	12	42
2	4	2	1	2	1	1	1	1	0	2	2	1	1	2	1	70	17	42
2	4	2	1	1	1	1	1	1	1	2	1	1	1	2	1	79	6	43
2	3	2	1	1	1	1	1	1	0	2	1	1	1	2	2	49	7	43
2	4	2	1	1	1	1	1	1	0	2	1	2	1	2	1	44	7	43
2	4	2	2	2	1	1	1	1	1	3	2	1	1	2	2	56	10	43
2	4	1	1	1	1	1	1	1	1	3	1	1	1	2	1	40	11	43
2	3	1	1	1	1	1	1	1	0	2	2	1	3	2	1	54	0	44
2	3	2	1	1	1	1	1	1	0	2	2	1	1	2	2	75	4	44
2	3	2	1	1	1	1	1	1	1	1	1	3	3	2	1	52	11	44
2	3	1	1	1	1	1	1	1	0	2	1	3	1	2	1	37	15	44
2	3	1	1	1	1	1	1	1	0	2	2	1	3	2	1	30	10	45
2	3	1	1	1	1	1	1	1	0	3	2	1	3	2	1	44	12	45
2	4	2	1	2	1	1	1	1	0	2	1	1	3	2	1	67	15	45
2	3	2	1	1	1	1	1	1	0	2	2	1	3	2	1	48	6	46
2	3	1	1	1	1	1	1	1	0	3	1	3	3	1	1	33	9	46
2	3	1	1	2	1	1	1	1	0	2	1	1	1	2	2	73	12	46
2	4	2	1	1	1	1	1	2	0	2	2	1	3	2	1	74	6	47
2	3	2	1	1	1	1	1	1	1	2	2	1	1	2	2	93	10	47
2	3	2	2	2	2	2	1	1	0	2	1	1	1	1	2	88	12	47
2	4	2	1	1	1	1	1	1	0	4	1	1	1	1	1	58	13	47
2	5	1	1	2	1	1	1	1	0	3	1	1	1	2	2	38	15	47
2	4	2	2	2	1	1	1	1	0	3	1	1	1	2	1	60	11	48
2	3	2	1	1	1	1	1	1	0	2	1	1	1	2	1	36	12	48
2	4	2	1	2	1	1	1	1	0	2	1	1	1	2	2	79	13	48
2	4	2	1	1	1	1	1	2	0	3	1	1	3	2	1	65	13	48
2	1	1	1	1	1	1	1	1	0	2	2	1	3	2	2	31	14	48
2	3	1	1	1	1	1	1	2	0	1	2	3	3	2	1	53	6	49
2	3	1	1	1	2	1	1	1	0	2	2	1	3	2	1	61	11	49
2	4	2	2	2	1	1	1	1	0	3	1	1	1	2	1	59	12	49
2	4	2	2	2	1	2	2	1	2	2	1	1	1	2	2	68	7	50
2	4	2	1	1	1	1	1	2	0	3	1	1	3	2	1	44	7	50
2	3	1	1	1	1	1	1	1	0	2	1	2	1	2	1	40	9	50
2	4	2	1	1	1	1	1	1	0	2	2	1	1	2	1	71	12	50
2	3	1	1	1	1	1	1	1	0	1	2	1	1	2	1	70	0	51
2	3	1	2	2	1	1	1	1	0	1	2	1	1	2	1	73	4	51
2	4	1	1	1	1	1	1	1	0	3	1	1	3	2	1	59	12	51
2	2	1	1	1	1	1	1	1	0	2	1	1	3	2	2	60	11	52
2	4	2	1	1	2	1	1	1	0	2	1	1	1	2	2	81	11	52
2	5	2	2	2	2	1	2	1	2	4	1	1	1	2	2	70	18	52
2	4	1	1	1	1	1	1	1	0	4	2	1	1	2	1	31	9	53
2	4	1	1	1	1	1	1	1	0	2	1	1	1	2	1	54	13	53
2	4	2	1	2	2	1	1	1	0	2	1	1	3	2	2	58	14	53
2	4	1	1	1	1	1	1	1	0	4	1	1	1	2	1	39	20	53
2	4	2	1	1	1	1	1	1	1	2	1	1	1	2	1	72	13	54
2	4	1	1	1	1	1	1	1	0	3	1	3	1	1	1	42	15	54
2	3	2	2	2	2	1	1	1	0	2	1	1	1	2	1	56	9	55
2	2	1	1	1	1	1	1	1	0	2	2	3	1	2	1	41	12	55
2	4	2	1	1	1	1	1	2	0	2	1	1	1	2	1	50	15	55
2	4	1	1	1	1	1	1	1	0	3	1	3	1	2	2	59	15	56
2	4	2	2	1	1	1	1	1	1	4	2	1	1	1	2	58	15	56
2	4	2	1	1	1	1	1	1	0	3	1	1	3	2	2	85	16	56
2	5	1	1	1	1	1	1	1	1	4	1	1	1	2	2	81	18	56
2	4	1	1	2	1	1	1	1	0	4	1	1	1	2	2	51	21	57
2	4	2	1	2	1	1	1	1	0	4	1	1	1	2	1	81	7	58
2	3	1	1	1	1	1	1	1	0	2	1	1	3	2	2	45	13	58
2	4	2	1	1	1	1	1	1	0	4	1	1	1	2	2	85	17	58
2	4	1	1	2	1	1	1	1	0	3	1	1	3	2	2	65	19	58
2	3	1	1	2	1	1	2	1	0	2	2	2	1	2	1	59	11	59
2	4	2	1	2	1	1	1	1	0	2	1	1	1	2	1	55	11	59
2	4	2	1	2	1	1	1	1	1	2	1	1	1	2	1	74	14	59
2	3	1	1	1	1	1	1	1	0	2	1	1	3	2	1	59	15	59
2	3	2	1	1	1	1	1	1	0	2	1	1	3	2	1	52	10	60
2	4	2	1	2	1	1	1	2	1	3	1	1	3	1	1	73	13	60
2	3	2	2	2	1	1	1	1	0	1	2	1	1	1	2	62	17	60
2	3	1	1	1	1	1	1	1	1	2	1	1	1	2	2	76	22	60
2	3	2	2	2	1	1	2	1	0	1	1	1	1	2	1	76	9	61
2	3	2	1	1	1	1	1	1	0	1	2	1	1	2	2	73	8	62
2	4	2	1	2	1	1	1	1	0	4	1	1	1	1	1	70	7	64
2	4	1	1	1	1	1	1	2	0	2	1	2	2	2	1	39	14	64
2	4	2	1	1	1	1	2	1	0	3	1	1	1	2	1	72	6	66
2	4	2	1	2	1	1	1	1	0	3	1	1	1	2	1	61	20	68
2	4	1	1	2	1	2	1	1	2	3	1	1	1	2	2	79	24	68
2	4	2	1	1	1	2	2	1	1	3	1	1	1	1	1	86	14	72
2	4	2	2	2	1	2	2	2	2	4	1	1	1	2	1	61	10	74
2	3	1	1	1	1	1	1	2	0	3	1	1	1	1	1	54	16	75
2	3	2	1	2	1	1	1	1	0	1	1	1	3	1	1	67	17	77
2	5	2	1	1	2	1	1	1	0	3	1	2	3	1	1	44	18	77

## Sheet: 30-64y
sex	Subjective feeling about health	Mental illness	Anorexia	Feelings about sleep satisfaction	Hyperactivity	Smorking	Drinking	Bereavement caused by the disaster	Change of work	Age	K6	PCL
2	3	1	0	2	2	1	1	2	2	30	3	19		Male	183
1	2	1	0	2	2	3	1	2	1	30	4	20		Female	182
1	3	1	0	2	2	3	1	2	2	30	1	21		N	365
2	3	1	0	2	2	1	3	2	1	30	10	45		Average age	50.137
1	3	1	0	1	2	3	1	2	1	31	0	17		SD	9.7718
2	3	1	0	1	2	1	3	2	1	31	0	19
2	3	1	0	2	2	3	3	1	1	31	6	20
2	3	1	0	2	2	3	3	2	2	31	3	22
2	2	1	0	1	2	1	1	2	1	31	4	22
2	3	1	0	2	2	3	1	2	2	31	6	25
1	3	1	0	2	2	3	3	2	1	31	8	26
2	3	1	0	3	1	1	1	2	1	31	10	37			No	Yes
2	3	1	0	1	2	1	1	2	2	31	9	40		Mental illness	346	19
2	1	1	0	2	2	1	3	2	2	31	14	48		Anorexia	348	17
2	4	1	0	4	2	1	1	2	1	31	9	53		Hyperactivity	260	105
1	2	2	0	1	2	2	1	2	1	32	3	17		Smorking	257	108
2	3	1	0	2	2	1	3	2	2	32	2	18		Drinking	182	183
2	3	1	0	1	2	2	3	2	1	32	6	19		Bereavement caused by the disaster	329	36
1	2	1	0	2	2	1	3	2	1	32	6	25		Change of work	120	245
2	2	1	0	1	2	1	3	2	1	32	3	26		Subjective feeling about health	56	309
1	3	1	0	3	1	3	1	2	2	32	2	28		Feelings about sleep satisfaction	231	134
2	3	1	0	2	2	1	1	2	1	33	3	23
2	3	1	0	2	2	1	1	2	2	33	5	34			<13	≥13
2	2	1	0	3	1	1	3	2	2	33	6	34		N	327	38
2	3	1	0	3	2	3	3	2	1	33	8	37		%	89.589	10.411
2	3	1	0	3	1	3	3	1	1	33	9	46			<44	≥44
1	3	1	0	2	2	3	1	2	1	33	20	54		N	301	64
1	3	1	0	2	2	3	1	2	1	34	0	17		%	82.4658	17.5342
2	1	1	0	1	2	1	3	2	1	34	0	18
1	3	1	0	2	2	2	1	2	2	34	3	20
1	3	1	0	1	2	3	1	2	2	34	0	21
1	2	1	0	1	2	3	3	2	2	34	8	21
2	2	1	0	2	2	1	1	2	1	34	0	26
2	3	1	0	2	1	1	1	2	2	34	2	37
2	3	1	0	2	2	1	3	2	1	34	13	38
2	4	1	0	2	1	1	1	2	1	34	12	42
1	3	1	0	2	2	3	3	2	1	35	1	19
2	3	1	0	1	2	2	3	2	1	35	1	20
2	3	1	0	1	2	1	3	2	2	35	1	22
1	3	1	0	2	2	2	3	2	1	35	3	22
2	2	1	0	1	2	1	1	2	1	35	5	25
1	3	1	0	3	1	3	3	1	1	35	12	47
1	2	1	0	1	2	1	3	2	1	36	0	17
1	2	1	0	2	2	3	3	2	2	36	4	17
1	1	1	0	2	2	2	3	2	2	36	0	20
1	3	1	0	2	1	2	1	2	1	36	3	23
1	1	1	0	2	2	3	1	2	1	36	0	26
2	3	1	0	2	2	1	1	2	2	36	8	35
2	3	1	0	2	1	1	1	2	1	36	12	48
1	3	1	0	1	2	3	3	2	2	37	0	17
1	3	1	0	2	2	3	1	2	2	37	0	18
1	3	1	0	2	2	3	3	2	1	37	8	20
2	3	1	0	2	2	1	1	2	1	37	1	22
2	4	1	0	1	2	2	3	2	1	37	3	28
2	3	1	0	2	2	1	3	2	2	37	6	37
2	3	1	0	2	1	3	1	2	1	37	15	44
1	1	1	0	1	2	2	1	2	2	38	0	17
2	3	1	0	2	2	3	2	2	1	38	1	18
2	3	1	0	2	1	2	1	1	1	38	7	23
2	1	1	0	1	2	1	3	2	1	38	5	24
2	3	1	0	2	2	1	1	1	1	38	4	25
1	4	1	0	2	2	1	1	2	1	38	8	35
2	5	1	0	3	1	1	1	2	2	38	15	47
1	3	1	0	4	2	1	3	2	1	38	18	73
1	3	1	0	3	2	2	3	2	2	39	4	24
2	3	1	0	1	2	1	2	2	1	39	2	33
2	4	1	0	4	1	1	1	2	1	39	20	53
2	4	2	0	2	1	2	2	2	1	39	14	64
1	1	1	0	1	2	2	3	2	1	40	0	17
1	3	1	0	1	2	3	3	2	1	40	0	19
2	3	1	0	1	2	1	3	2	1	40	3	19
2	3	1	0	1	2	1	1	1	1	40	0	20
1	3	1	0	2	2	3	3	2	1	40	4	20
1	3	1	0	2	1	3	3	1	1	40	8	30
2	3	1	0	2	1	2	1	2	1	40	9	50
1	3	1	0	2	1	2	3	2	1	41	5	23
1	3	1	0	2	2	2	3	2	2	41	2	32
1	4	1	0	3	1	1	1	2	1	41	9	38
2	2	1	0	2	2	3	1	2	1	41	12	55
2	3	1	0	2	2	1	1	2	1	42	3	20
2	3	1	0	2	2	1	1	2	1	42	0	22
2	3	1	0	3	2	2	3	2	1	42	0	25
2	3	1	0	3	1	1	3	2	1	42	9	31
2	3	1	0	3	1	1	3	2	1	42	13	32
2	4	1	0	3	1	3	1	1	1	42	15	54
1	3	1	0	2	2	1	3	2	1	42	14	60
2	1	1	0	1	2	1	1	2	1	43	0	18
2	3	1	0	1	2	1	1	2	1	43	2	19
2	2	1	0	1	2	1	1	2	2	43	6	29
2	3	1	0	2	2	1	1	2	1	43	14	34
2	3	2	0	2	2	3	3	2	2	43	7	35
1	3	2	0	1	1	3	3	1	1	44	2	21
1	3	1	0	1	2	1	3	2	1	44	4	22
2	4	1	0	2	1	2	1	2	1	44	7	43
2	3	1	0	3	2	1	3	2	1	44	12	45
2	4	2	0	3	1	1	3	2	1	44	7	50
2	5	1	0	3	1	2	3	1	1	44	18	77
1	2	1	0	1	2	3	3	2	2	45	0	17
1	2	1	0	1	2	3	1	2	2	45	1	18
1	3	1	0	1	2	3	3	2	1	45	2	18
1	2	1	0	2	2	3	3	2	1	45	4	28
1	3	1	0	2	1	3	3	2	2	45	1	33
2	3	1	0	1	2	1	1	2	1	45	5	33
1	3	1	0	2	2	1	3	2	2	45	12	40
2	3	1	0	2	1	1	3	2	2	45	13	58
1	3	1	0	2	1	1	3	2	2	46	9	24
2	2	1	0	1	2	1	1	2	1	46	3	31
2	2	1	0	2	2	1	1	2	1	46	4	31
2	2	1	0	1	2	1	3	2	1	46	8	36
2	3	2	0	2	1	1	3	2	1	46	12	41
1	3	1	0	2	1	1	1	2	1	46	14	43
1	3	1	0	2	2	2	3	2	1	47	0	17
1	3	1	0	2	2	2	3	2	1	47	0	17
2	3	1	0	1	2	1	1	2	2	47	0	17
1	3	1	0	2	1	2	3	2	1	47	5	17
2	3	1	0	2	2	1	1	2	1	47	5	18
1	3	1	0	3	2	3	1	1	1	47	10	18
1	3	1	0	1	2	1	3	2	1	47	0	20
1	3	1	0	1	1	3	3	2	1	47	4	22
1	3	1	0	2	2	3	3	2	2	47	2	23
2	3	1	0	2	1	1	3	2	1	47	3	30
1	2	1	0	2	1	2	3	2	1	47	3	31
2	3	1	0	2	2	1	3	2	2	47	10	42
1	3	1	0	1	2	3	3	2	2	48	0	17
1	3	1	0	1	2	1	3	2	1	48	6	23
1	3	1	0	2	2	3	3	2	1	48	2	32
2	3	1	0	2	2	3	3	2	1	48	6	34
2	3	1	0	2	2	1	1	2	2	48	5	35
2	3	1	0	2	2	1	3	2	1	48	6	46
1	4	1	0	3	1	2	3	2	1	48	9	54
1	1	1	0	1	2	2	3	1	2	49	1	17
2	3	1	0	1	2	1	1	2	1	49	0	19
2	3	1	0	2	2	1	3	2	1	49	0	23
2	3	1	0	1	2	3	3	2	1	49	5	28
1	3	1	0	2	2	3	3	2	1	49	4	31
2	3	1	0	4	1	2	1	2	1	49	10	35
1	3	1	0	1	2	3	3	2	2	49	9	36
1	3	1	0	1	2	2	3	2	1	49	5	37
2	3	1	0	3	1	1	1	2	1	49	10	41
2	3	1	0	2	1	1	1	2	2	49	7	43
1	2	1	0	1	2	2	3	2	1	50	0	17
1	3	1	0	1	2	1	1	2	2	50	0	17
1	3	1	0	1	2	3	3	2	2	50	0	17
1	3	1	0	2	2	3	2	2	1	50	1	17
2	3	1	0	2	2	1	1	2	2	50	0	18
1	3	1	0	1	2	3	3	2	1	50	0	22
1	3	1	0	2	2	2	3	2	1	50	5	22
1	3	1	0	1	2	3	3	1	1	50	1	23
2	3	1	0	2	2	1	1	2	1	50	3	24
2	2	1	0	2	2	1	1	2	2	50	5	24
1	3	1	0	2	2	3	3	2	1	50	8	25
1	2	1	0	1	2	3	3	1	1	50	8	26
2	3	1	0	1	2	2	3	2	1	50	4	29
2	3	1	0	1	2	3	1	2	2	50	4	30
1	3	1	0	1	2	2	2	2	1	50	11	35
2	4	2	0	2	1	1	1	2	1	50	15	55
2	3	1	0	1	2	1	1	2	2	51	0	17
1	3	1	0	1	2	3	3	2	2	51	0	17
2	3	1	0	2	2	1	1	2	1	51	3	19
2	2	1	0	1	2	1	1	2	1	51	0	20
2	3	1	0	2	2	1	1	2	1	51	2	20
1	4	1	0	3	1	2	1	2	1	51	5	25
1	2	1	0	2	2	1	3	2	1	51	0	34
2	4	1	0	2	2	1	1	2	2	51	7	36
2	3	1	0	3	1	1	1	2	1	51	12	36
2	4	1	0	4	1	1	1	2	2	51	21	57
1	3	1	0	2	2	3	3	2	2	52	0	18
1	3	1	0	1	2	3	3	2	1	52	2	18
2	4	1	0	1	2	1	1	2	1	52	8	20
1	3	1	0	1	2	2	3	2	1	52	4	21
1	4	1	0	2	2	2	3	2	2	52	6	21
2	3	1	0	1	2	1	1	2	2	52	1	23
2	3	2	0	1	2	1	1	2	2	52	2	25
2	3	1	0	1	2	1	1	1	1	52	0	27
2	3	1	0	4	2	1	1	2	1	52	5	27
1	2	1	0	3	1	3	1	2	2	52	6	34
1	3	1	0	4	1	3	3	2	1	52	13	38
2	3	1	0	2	2	1	1	2	1	52	7	42
1	3	1	0	2	1	3	3	2	1	52	14	45
2	3	1	0	2	1	1	3	2	1	52	10	60
1	3	1	0	1	2	2	3	2	1	53	0	17
1	2	1	0	1	2	2	3	2	2	53	2	18
1	2	1	0	1	2	3	3	2	2	53	4	23
1	2	1	0	2	2	3	3	2	2	53	6	23
1	1	1	0	1	2	2	3	2	2	53	10	24
1	3	1	0	2	2	2	3	1	2	53	5	25
2	3	1	0	2	2	1	3	2	1	53	8	25
1	3	1	0	1	2	2	3	2	1	53	4	26
2	3	1	0	3	1	1	1	2	1	53	6	26
2	2	1	0	1	2	1	1	1	1	53	2	28
1	4	1	0	2	1	3	3	2	1	53	12	39
1	4	1	0	2	1	3	3	1	1	53	6	40
2	2	1	0	2	2	1	1	1	1	53	5	41
1	4	1	0	2	1	3	1	2	2	53	10	48
2	3	2	0	1	2	3	3	2	1	53	6	49
1	3	2	0	2	2	2	1	2	1	53	12	50
1	2	1	0	1	2	3	2	2	1	54	0	17
1	3	1	0	1	2	2	3	2	2	54	0	19
2	4	1	0	3	1	1	1	1	1	54	7	25
1	3	1	0	2	1	1	3	2	1	54	7	26
1	3	1	0	1	2	3	1	2	1	54	1	27
1	2	1	0	1	2	3	3	2	2	54	3	28
2	2	1	0	1	2	1	3	2	2	54	11	29
1	3	1	0	1	2	2	3	2	1	54	7	38
2	3	1	0	2	2	1	3	2	1	54	0	44
2	4	1	0	2	1	1	1	2	1	54	13	53
1	3	1	0	1	1	3	1	2	1	54	7	69
2	3	2	0	3	1	1	1	1	1	54	16	75
1	2	1	0	1	2	3	3	2	2	55	0	17
1	3	1	0	1	2	3	3	2	1	55	0	19
1	4	1	0	1	2	3	3	2	1	55	0	19
1	3	1	0	1	2	2	3	2	2	55	1	19
1	3	1	0	1	2	3	1	2	2	55	4	19
1	2	1	0	2	2	2	3	2	2	55	2	20
2	3	1	0	2	2	1	1	2	1	55	6	22
1	3	2	0	1	1	1	1	2	2	55	4	23
1	3	1	0	2	1	3	3	2	1	55	6	30
2	4	1	0	2	1	1	1	2	1	55	11	59
1	3	1	0	1	2	3	1	1	1	56	0	17
1	3	1	0	2	2	3	3	1	2	56	0	18
1	3	1	0	1	2	3	1	2	1	56	2	18
1	2	1	0	1	2	2	2	2	2	56	1	20
2	3	1	0	2	2	1	1	2	2	56	2	20
2	3	1	0	2	2	1	1	2	1	56	2	21
1	4	1	0	2	1	3	3	2	1	56	16	22
1	3	1	0	2	2	3	3	2	2	56	11	33
1	4	1	0	2	1	3	3	2	2	56	8	41
2	3	1	0	2	1	1	1	2	1	56	9	55
2	2	1	0	1	2	1	1	1	1	57	0	20
2	3	1	0	1	2	1	1	2	2	57	3	23
1	3	1	0	1	2	1	1	2	2	57	5	23
2	4	1	0	2	1	1	1	2	2	57	0	24
1	2	1	0	2	2	3	1	2	1	57	7	25
2	3	1	0	2	1	1	1	2	1	57	4	27
2	3	1	0	2	2	1	3	2	1	57	9	30
2	3	1	0	2	2	1	1	2	1	57	3	31
2	3	1	0	2	2	1	1	2	1	57	7	36
2	4	1	0	2	2	1	1	2	1	57	0	41
1	3	1	0	1	2	3	3	2	2	57	0	43
1	3	1	0	2	2	2	3	2	1	57	7	43
1	2	1	0	1	2	1	1	2	2	57	0	44
1	2	1	0	1	2	2	3	2	2	58	0	17
1	2	1	0	2	2	2	3	1	1	58	0	18
1	3	1	0	1	2	2	3	2	1	58	1	18
1	2	1	0	1	2	2	1	2	1	58	0	19
1	2	1	0	1	2	2	3	2	1	58	1	21
2	3	1	0	2	2	1	1	2	2	58	12	22
2	2	1	0	2	2	1	1	2	1	58	0	25
2	3	1	0	2	2	1	1	2	1	58	8	25
2	3	1	0	2	2	1	1	2	1	58	7	26
1	3	1	0	2	2	1	3	2	1	58	6	30
1	3	1	0	2	2	1	3	2	2	58	4	33
2	2	1	0	2	2	1	1	2	2	58	6	33
1	3	1	0	2	1	3	3	2	1	58	7	33
1	3	1	0	3	2	3	3	2	1	58	17	46
2	4	1	0	4	1	1	1	1	1	58	13	47
2	4	1	0	2	1	1	3	2	2	58	14	53
2	3	1	0	1	2	3	1	2	2	59	2	19
2	3	1	0	1	2	1	1	2	2	59	0	21
2	1	1	0	1	2	1	1	2	2	59	4	21
2	3	1	0	1	2	1	1	2	1	59	0	22
2	3	1	0	2	2	1	1	2	1	59	0	22
1	3	1	0	2	2	2	3	2	2	59	1	22
1	3	1	0	1	2	2	1	2	1	59	2	22
1	2	1	0	2	1	1	3	2	1	59	6	22
2	3	1	0	2	1	1	1	2	1	59	5	23
2	3	1	0	2	2	1	1	2	1	59	5	24
2	3	1	0	2	2	1	3	2	1	59	5	26
1	4	1	0	3	1	1	3	2	1	59	6	26
1	4	2	0	1	2	2	2	2	2	59	6	28
1	3	1	0	2	2	3	3	2	1	59	0	31
1	3	1	0	1	2	2	3	2	1	59	9	36
1	3	1	0	2	2	2	3	2	1	59	10	36
1	3	1	0	2	2	1	3	2	1	59	12	48
2	4	1	0	3	1	1	1	2	1	59	12	49
2	4	1	0	3	1	1	3	2	1	59	12	51
2	4	1	0	3	1	3	1	2	2	59	15	56
2	3	1	0	2	2	2	1	2	1	59	11	59
2	3	1	0	2	1	1	3	2	1	59	15	59
1	3	1	0	2	2	3	3	2	1	60	0	17
1	1	1	0	1	2	2	3	2	2	60	0	20
1	3	1	0	1	2	2	1	2	2	60	1	20
2	2	1	0	1	2	1	1	2	2	60	18	26
2	3	1	0	2	2	1	1	2	1	60	6	29
2	4	1	0	2	1	3	3	2	1	60	6	29
2	3	1	0	1	2	3	3	2	2	60	2	31
2	4	1	0	2	1	1	1	1	1	60	5	32
2	3	1	0	2	2	1	1	2	1	60	10	32
2	3	1	0	3	1	1	1	2	2	60	10	33
2	2	1	0	2	2	1	1	2	2	60	9	34
1	3	1	0	1	2	1	3	2	1	60	10	34
2	3	1	0	2	1	3	3	2	1	60	12	38
2	4	1	0	3	1	1	1	2	1	60	11	48
2	2	1	0	2	1	1	3	2	2	60	11	52
1	3	1	0	1	2	3	3	2	1	61	0	17
1	2	1	0	2	2	3	1	2	2	61	1	17
1	2	1	0	1	2	2	1	2	1	61	0	18
1	3	1	0	1	2	2	3	2	1	61	0	18
2	3	1	0	1	2	1	1	2	1	61	0	19
1	3	1	0	2	2	1	1	2	1	61	0	19
2	3	2	0	1	2	1	1	2	2	61	0	19
1	3	1	0	1	2	3	3	2	1	61	1	20
1	3	1	0	1	1	2	3	2	2	61	4	22
1	3	1	0	2	2	1	3	2	1	61	12	24
2	3	1	0	1	2	1	1	2	1	61	1	26
2	3	1	0	2	2	1	1	2	1	61	1	27
2	4	1	0	4	1	1	3	2	1	61	11	28
1	3	1	0	1	1	3	1	2	1	61	11	29
1	3	1	0	1	2	2	1	2	1	61	1	30
1	3	1	0	2	2	3	3	1	1	61	5	31
1	4	1	0	2	2	2	3	2	1	61	4	34
2	3	1	0	2	2	1	1	1	2	61	11	34
2	3	1	0	2	1	1	3	2	2	61	7	36
1	3	1	0	1	2	3	3	2	2	61	7	38
2	3	1	0	1	2	1	1	2	2	61	8	38
2	3	1	0	2	2	1	3	2	1	61	11	49
1	4	1	0	2	1	2	3	2	1	61	15	54
2	4	1	0	3	1	1	1	2	1	61	20	68
2	3	1	0	1	2	1	1	2	1	62	0	17
1	3	1	0	1	2	1	3	2	2	62	2	17
1	3	1	0	1	2	3	3	2	1	62	0	18
1	3	1	0	1	2	1	3	2	1	62	1	19
1	3	1	0	3	2	1	1	2	1	62	0	20
2	3	1	0	1	2	1	1	2	2	62	4	21
1	2	1	0	1	2	2	3	2	2	62	2	22
2	2	1	0	1	2	1	1	2	1	62	2	23
2	3	2	0	1	2	1	1	2	1	62	7	25
1	3	1	0	2	2	3	3	1	1	62	9	27
1	3	1	0	2	2	1	2	2	1	62	5	30
2	4	2	0	2	1	1	1	1	1	62	11	35
2	3	1	0	1	2	1	1	1	2	62	17	60
2	1	1	0	2	2	1	1	2	2	63	0	17
1	1	1	0	1	2	2	1	2	2	63	0	17
2	3	1	0	1	2	1	1	2	2	63	0	19
1	2	1	0	1	2	3	3	2	2	63	2	29
1	2	1	0	2	2	3	1	2	1	63	4	31
2	3	1	0	2	2	1	1	2	1	63	8	32
1	3	1	0	2	2	2	3	2	2	63	7	47
1	3	1	0	2	1	3	3	2	1	63	11	48
1	3	1	0	1	2	3	3	2	1	64	0	18
2	3	1	0	2	2	1	1	2	2	64	0	19
1	3	1	0	2	1	2	3	2	1	64	12	23
2	3	1	0	2	2	1	3	2	1	64	0	24
1	4	1	0	1	1	2	1	2	1	64	8	33
1	4	1	0	3	2	3	1	2	1	64	21	33
2	3	2	0	2	1	1	3	2	1	64	3	35
1	3	1	0	2	1	1	1	1	2	64	11	49
1	3	1	0	3	1	2	3	2	1	64	11	50
1	3	1	1	3	1	2	3	2	2	33	12	62
2	4	1	1	3	1	1	1	2	1	40	11	43
1	5	1	1	4	1	3	1	1	1	40	16	70
2	3	1	1	1	1	1	1	2	1	42	1	24
1	4	1	1	3	1	2	3	2	1	43	12	41
1	3	1	1	2	2	1	3	2	2	51	6	34
2	3	1	1	1	1	3	3	2	1	52	11	44
2	3	1	1	3	1	1	1	2	1	56	10	31
2	4	1	1	3	2	1	1	2	2	56	10	43
1	3	1	1	2	2	3	3	2	1	57	6	54
1	3	1	1	3	1	3	3	2	1	57	24	85
2	4	1	1	4	2	1	1	1	2	58	15	56
1	4	1	1	3	1	2	1	2	2	60	6	36
1	3	2	1	2	1	3	3	2	1	62	21	59
1	4	1	2	3	1	3	1	1	1	33	16	65
1	4	1	2	2	1	1	1	2	1	57	16	40
2	4	2	2	4	1	1	1	2	1	61	10	74

## Sheet: ≥65y
sex	Subjective feeling about health	Mental illness	Anorexia	Feelings about sleep satisfaction	Hyperactivity	Smorking	Drinking	Bereavement caused by the disaster	Change of work	Age	K6	PCL
1	1	1	0	1	2	3	1	2	1	79	0	17		Male	81
1	2	1	0	1	2	1	1	2	2	75	0	17		Female	96
1	2	1	0	1	2	1	1	2	2	79	0	17		N	177
2	2	1	0	1	2	1	1	2	2	79	0	17		Average age	75.5085
1	2	1	0	1	2	3	1	2	2	65	0	17		SD	7.00857
1	2	1	0	1	2	2	2	2	2	73	0	17
1	2	1	0	1	2	2	3	2	2	70	0	17
2	3	1	0	1	2	1	1	2	1	80	0	17
1	3	1	0	1	2	2	3	2	1	75	0	17
2	3	1	0	1	1	1	1	2	2	91	0	17
2	3	1	0	1	2	3	1	2	2	68	0	17
1	3	1	0	1	2	2	2	2	2	67	0	17			No	Yes
2	3	1	0	1	2	1	3	2	2	80	0	17		Mental illness	168	9
1	3	1	0	1	2	3	3	2	2	67	0	17		Anorexia	158	19
2	3	1	0	2	1	1	1	2	1	91	0	17		Hyperactivity	106	71
1	3	1	0	2	2	1	3	2	1	72	1	17		Smorking	164	13
1	3	1	0	2	2	2	3	2	2	73	1	17		Drinking	116	61
2	3	1	0	1	1	1	1	2	2	73	0	18		Bereavement caused by the disaster	156	21
1	3	1	0	1	2	1	3	2	2	67	0	18		Change of work	96	81
1	1	1	0	2	2	1	1	2	1	66	0	18		Subjective feeling about health	53	124
1	3	1	0	2	2	1	3	2	2	70	0	18		Feelings about sleep satisfaction	100	77
1	3	1	0	1	2	2	3	2	2	71	1	18
1	2	1	0	2	2	1	3	2	1	65	1	18			<13	≥13
2	4	1	0	2	2	1	1	2	2	83	4	18		N	147	30
2	1	1	0	1	2	1	1	2	1	78	0	19		%	83.0508	16.9492
1	1	1	0	1	2	3	3	2	1	67	0	19			<44	≥44
1	3	1	0	1	2	2	1	2	1	83	0	19		N	126	51
2	4	1	0	1	2	1	1	2	1	70	2	19		%	71.1864	28.8136
2	2	1	0	2	1	1	1	2	2	77	3	19
2	3	1	0	1	2	1	1	2	2	68	5	19
1	3	1	0	1	1	3	3	2	2	78	6	19
2	3	1	0	1	2	1	1	2	2	76	0	20
2	3	1	0	1	2	1	1	2	2	80	0	20
2	3	1	0	2	2	1	1	2	1	81	0	20
1	3	1	0	2	2	2	1	2	1	68	0	20
2	3	1	0	1	2	1	1	2	2	72	1	20
2	3	1	0	2	2	1	1	2	2	84	1	20
2	3	1	0	1	2	1	1	2	2	83	3	20
2	3	1	1	2	2	1	1	2	2	87	4	20
1	3	1	0	1	2	2	3	2	1	90	10	20
1	2	1	0	1	2	3	3	2	1	68	0	21
2	2	1	0	1	2	1	1	2	2	68	0	21
2	3	1	0	1	2	1	1	2	2	69	0	21
1	4	2	0	4	1	2	2	2	2	80	0	21
1	3	1	0	1	2	1	3	2	1	68	1	21
2	3	1	0	2	2	1	1	2	2	77	4	21
1	4	1	0	3	1	2	1	2	2	80	4	21
2	3	1	0	1	2	1	1	1	1	78	0	22
1	2	1	0	2	1	2	1	2	1	66	1	22
2	3	1	0	1	2	1	1	2	2	84	2	22
2	3	1	0	1	2	1	3	2	2	72	2	22
1	3	1	0	1	2	2	1	1	1	80	0	23
1	3	1	0	1	2	1	3	2	2	74	0	23
1	4	1	0	2	1	1	3	2	1	82	1	23
2	3	1	0	1	2	1	1	1	2	66	2	23
2	4	1	0	1	2	1	1	2	2	74	2	23
2	4	1	0	2	2	1	1	1	1	66	2	23
2	3	1	0	4	2	1	3	2	1	69	2	23
2	2	1	0	2	1	1	1	2	2	88	4	23
1	3	1	0	2	2	1	1	2	1	66	10	23
1	2	1	0	1	2	2	3	2	1	78	0	24
2	3	1	0	1	2	1	1	1	1	66	0	24
2	3	1	0	1	2	1	1	2	1	75	1	24
1	3	1	0	1	2	3	3	2	1	75	1	24
2	3	1	0	1	2	1	3	2	2	74	3	24
2	3	1	0	3	1	1	1	2	1	68	6	24
1	2	1	0	1	2	3	3	2	1	71	1	25
1	2	1	0	2	2	1	1	2	2	81	1	25
1	3	1	0	2	2	2	1	2	1	74	2	25
2	3	1	0	2	2	1	1	2	2	87	2	25
1	3	1	0	2	2	3	1	2	2	82	2	25
2	3	1	0	1	2	1	1	2	1	75	0	26
1	3	1	0	2	2	1	1	2	2	75	0	26
2	2	1	0	1	2	1	1	2	2	79	1	26
2	4	1	0	2	2	1	1	2	1	78	1	26
2	3	1	0	1	1	1	1	2	2	78	7	27
2	1	1	0	1	1	1	1	2	2	66	1	28
1	3	1	0	1	2	2	3	1	1	94	3	28
2	3	1	0	2	1	1	3	1	2	74	6	28
2	3	1	0	2	2	1	1	2	2	72	12	28
2	3	1	0	2	2	1	1	2	1	72	18	28
2	3	1	0	3	2	2	3	2	2	69	4	29
2	4	1	0	1	2	1	1	2	2	84	10	29
1	3	1	0	1	2	2	3	2	2	73	11	29
1	3	1	0	2	2	3	1	2	1	70	14	29
1	3	1	0	1	2	2	3	1	1	67	3	30
2	3	1	0	1	2	1	1	2	1	67	4	30
2	4	1	0	2	1	1	3	2	2	84	4	30
2	3	1	0	1	2	1	1	1	1	71	5	30
1	1	1	0	1	2	1	3	1	1	72	6	30
1	3	1	0	2	1	2	3	1	1	65	11	30
1	4	1	1	2	2	2	1	2	2	72	4	31
1	3	1	0	2	1	2	3	2	2	79	7	31
2	3	1	0	2	2	1	3	2	2	81	8	31
2	3	1	0	2	2	1	1	2	2	67	10	31
1	2	2	0	1	2	2	3	2	1	78	4	32
1	3	1	0	1	2	2	1	2	2	77	7	32
2	3	1	0	1	2	1	1	2	2	76	9	32
1	3	1	0	2	2	1	3	2	1	68	0	33
1	2	1	0	1	2	2	2	2	2	69	3	33
2	3	1	0	2	2	1	1	2	1	67	6	33
2	3	1	0	2	2	1	3	2	1	70	6	33
1	3	1	0	2	1	2	3	2	1	71	6	33
2	4	1	1	3	1	1	1	2	1	77	6	33
1	3	1	0	1	2	1	3	1	1	70	14	33
1	3	1	0	2	1	2	1	2	2	81	4	34
2	3	1	0	2	2	1	1	2	2	77	6	34
1	4	1	0	1	2	2	3	2	2	84	4	35
2	2	1	0	2	2	1	1	2	2	75	6	35
2	4	1	0	3	1	1	1	2	2	77	8	35
1	4	1	0	2	1	1	3	2	1	73	3	36
2	5	2	0	3	1	1	1	2	2	84	11	36
1	3	1	0	2	1	2	1	2	2	81	8	37
2	4	2	1	3	1	2	1	2	2	79	10	37
2	3	1	0	3	2	3	1	2	2	73	11	37
2	4	1	1	2	1	1	1	1	1	85	9	38
1	4	1	0	1	1	1	1	2	2	82	11	38
2	3	1	0	1	1	1	1	2	1	79	3	39
1	3	1	1	1	1	3	3	2	1	85	7	40
2	2	1	0	3	1	1	1	2	2	90	8	40
2	3	1	0	1	2	1	1	2	2	73	11	42
1	3	1	0	2	1	2	3	2	2	91	12	42
1	4	1	0	1	2	2	2	2	2	85	16	42
2	4	1	0	2	2	1	1	2	1	70	17	42
2	4	1	1	2	1	1	1	2	1	79	6	43
1	3	1	0	1	1	1	1	2	1	87	10	43
2	3	1	0	2	2	1	1	2	2	75	4	44
1	4	1	0	2	2	2	3	2	1	73	12	44
1	4	1	0	4	1	1	1	2	2	82	14	44
1	4	1	0	2	1	1	3	2	1	83	5	45
1	3	1	0	1	2	1	1	2	1	67	9	45
2	4	1	0	2	1	1	3	2	1	67	15	45
2	3	1	0	2	1	1	1	2	2	73	12	46
1	3	1	0	2	2	1	3	2	2	75	12	46
2	4	2	0	2	2	1	3	2	1	74	6	47
2	3	1	1	2	2	1	1	2	2	93	10	47
2	3	1	0	2	1	1	1	1	2	88	12	47
2	4	1	0	2	1	1	1	2	2	79	13	48
2	4	2	0	3	1	1	3	2	1	65	13	48
1	3	1	0	2	1	1	3	2	2	66	17	48
1	3	1	0	1	2	1	1	2	1	75	10	49
2	4	1	2	2	1	1	1	2	2	68	7	50
2	4	1	0	2	2	1	1	2	1	71	12	50
2	3	1	0	1	2	1	1	2	1	70	0	51
2	3	1	0	1	2	1	1	2	1	73	4	51
2	4	1	0	2	1	1	1	2	2	81	11	52
2	5	1	2	4	1	1	1	2	2	70	18	52
2	4	1	1	2	1	1	1	2	1	72	13	54
1	4	2	0	3	1	1	1	2	2	94	14	54
1	3	1	0	3	1	1	1	2	1	83	18	55
2	4	1	0	3	1	1	3	2	2	85	16	56
2	5	1	1	4	1	1	1	2	2	81	18	56
1	5	1	0	4	1	2	1	2	2	85	8	57
1	3	1	0	3	1	1	3	2	1	71	10	57
1	4	1	1	3	1	1	3	1	1	78	14	57
1	4	2	1	3	1	1	2	2	2	82	17	57
1	5	1	0	3	1	2	2	2	2	66	21	57
1	3	1	0	1	2	1	3	2	1	76	3	58
2	4	1	0	4	1	1	1	2	1	81	7	58
2	4	1	0	4	1	1	1	2	2	85	17	58
2	4	1	0	3	1	1	3	2	2	65	19	58
1	3	1	0	3	1	2	3	1	2	66	11	59
2	4	1	1	2	1	1	1	2	1	74	14	59
1	4	1	0	2	1	2	3	2	1	68	12	60
2	4	2	1	3	1	1	3	1	1	73	13	60
2	3	1	1	2	1	1	1	2	2	76	22	60
2	3	1	0	1	1	1	1	2	1	76	9	61
2	3	1	0	1	2	1	1	2	2	73	8	62
1	4	1	0	2	1	2	3	1	1	79	17	63
2	4	1	0	4	1	1	1	1	1	70	7	64
1	4	1	0	4	1	2	2	2	1	69	18	65
2	4	1	0	3	1	1	1	2	1	72	6	66
2	4	1	2	3	1	1	1	2	2	79	24	68
1	1	1	0	2	1	2	3	2	2	68	15	69
1	3	1	0	1	2	1	3	2	1	73	7	71
2	4	1	1	3	1	1	1	1	1	86	14	72
2	3	1	0	1	1	1	3	1	1	67	17	77

## Sheet: Figure
K6	K6	Male	Femare	Total		PCL	PCL	Mare	Female	Total
0	0	69	46	115		17	17-19	73	34	107
0	1	28	14	42		17	20-24	57	58	115
0	2	16	20	36		17	25-29	27	41	68
0	3	11	18	29		17	30-34	35	33	68
0	4	22	17	39		17	35-39	16	25	41
0	5	10	16	26		17	40-44	15	20	35
0	6	17	24	41		17	45-49	13	19	32
0	7	12	16	28		17	50-54	7	16	23
0	8	11	12	23		17	55-59	9	16	25
0	9	7	11	18		17	60-64	4	8	12
0	10	10	15	25		17	65-69	4	3	7
0	11	10	15	25		17	over 70	4	5	9
0	12	13	14	27		17		264	278	542
0	13	1	9	10		17
0	14	8	6	14		17
0	15	2	8	10		17
0	16	5	2	7		17
0	17	4	4	8		17
0	18	3	5	8		17
0	19	0	1	1		17
0	20	1	2	3		17
0	21	3	1	4		17
0	22	0	1	1		17
0	23	0	0	0		17
0	24	1	1	2		17
0						17
0						17
0						17
0						17
0						17
0						17
0						17
0						17
0						17
0						17
0						17
0						17
0						17
0						17
0						17
0						17
1						17
1						17
1						17
1						17
1						17
2						17
3						17
4						17
5						17
0						18
0						18
0						18
0						18
0						18
0						18
0						18
0						18
0						18
0						18
0						18
0						18
0						18
0						18
0						18
1						18
1						18
1						18
1						18
1						18
2						18
2						18
2						18
2						18
2						18
4						18
5						18
10						18
0						19
0						19
0						19
0						19
0						19
0						19
0						19
0						19
0						19
0						19
0						19
0						19
0						19
0						19
0						19
1						19
1						19
1						19
2						19
2						19
2						19
3						19
3						19
3						19
3						19
4						19
5						19
6						19
6						19
0						20
0						20
0						20
0						20
0						20
0						20
0						20
0						20
0						20
0						20
0						20
1						20
1						20
1						20
1						20
1						20
1						20
2						20
2						20
2						20
3						20
3						20
3						20
4						20
4						20
4						20
6						20
8						20
8						20
10						20
0						21
0						21
0						21
0						21
0						21
0						21
1						21
1						21
1						21
2						21
2						21
4						21
4						21
4						21
4						21
4						21
6						21
8						21
0						22
0						22
0						22
0						22
0						22
1						22
1						22
1						22
1						22
2						22
2						22
2						22
2						22
3						22
3						22
4						22
4						22
4						22
4						22
5						22
6						22
6						22
12						22
16						22
0						23
0						23
0						23
1						23
1						23
1						23
2						23
2						23
2						23
2						23
2						23
2						23
3						23
3						23
3						23
4						23
4						23
4						23
5						23
5						23
5						23
6						23
6						23
7						23
10						23
12						23
0						24
0						24
0						24
0						24
1						24
1						24
1						24
3						24
3						24
4						24
5						24
5						24
5						24
6						24
9						24
10						24
12						24
0						25
0						25
1						25
1						25
2						25
2						25
2						25
2						25
4						25
5						25
5						25
5						25
6						25
6						25
7						25
7						25
7						25
8						25
8						25
8						25
0						26
0						26
0						26
0						26
1						26
1						26
1						26
3						26
4						26
5						26
6						26
6						26
7						26
7						26
8						26
8						26
18						26
0						27
1						27
1						27
4						27
5						27
7						27
9						27
1						28
2						28
2						28
3						28
3						28
3						28
4						28
5						28
6						28
6						28
11						28
12						28
18						28
2						29
4						29
4						29
6						29
6						29
6						29
10						29
11						29
11						29
11						29
14						29
1						30
3						30
3						30
4						30
4						30
4						30
5						30
5						30
6						30
6						30
6						30
8						30
9						30
11						30
0						31
2						31
3						31
3						31
3						31
4						31
4						31
4						31
4						31
5						31
7						31
8						31
9						31
10						31
10						31
2						32
2						32
4						32
5						32
7						32
8						32
9						32
10						32
13						32
0						33
1						33
2						33
3						33
4						33
5						33
6						33
6						33
6						33
6						33
6						33
7						33
8						33
10						33
11						33
14						33
21						33
0						34
4						34
4						34
5						34
6						34
6						34
6						34
6						34
6						34
9						34
10						34
11						34
14						34
3						35
4						35
5						35
6						35
7						35
8						35
8						35
8						35
10						35
11						35
11						35
3						36
6						36
7						36
7						36
7						36
8						36
9						36
9						36
10						36
11						36
12						36
2						37
5						37
6						37
8						37
8						37
10						37
10						37
11						37
7						38
7						38
8						38
9						38
9						38
11						38
12						38
13						38
13						38
3						39
12						39
6						40
7						40
8						40
9						40
12						40
16						40
0						41
5						41
8						41
10						41
12						41
12						41
7						42
10						42
11						42
12						42
12						42
16						42
17						42
0						43
6						43
7						43
7						43
7						43
10						43
10						43
11						43
14						43
0						44
0						44
4						44
11						44
12						44
14						44
15						44
5						45
9						45
10						45
12						45
14						45
15						45
6						46
9						46
12						46
12						46
17						46
6						47
7						47
10						47
12						47
12						47
13						47
15						47
10						48
11						48
11						48
12						48
12						48
13						48
13						48
14						48
17						48
6						49
10						49
11						49
11						49
12						49
7						50
7						50
9						50
11						50
12						50
12						50
0						51
4						51
12						51
11						52
11						52
18						52
9						53
13						53
14						53
20						53
6						54
9						54
13						54
14						54
15						54
15						54
20						54
9						55
12						55
15						55
18						55
15						56
15						56
16						56
18						56
8						57
10						57
14						57
17						57
21						57
21						57
3						58
7						58
13						58
17						58
19						58
11						59
11						59
11						59
14						59
15						59
21						59
10						60
12						60
13						60
14						60
17						60
22						60
9						61
8						62
12						62
17						63
7						64
14						64
16						65
18						65
6						66
20						68
24						68
7						69
15						69
16						70
7						71
14						72
18						73
10						74
16						75
17						77
18						77
24						85

## Sheet: Risk perception
Sex	ARS	Delayed effects	Genetic effects			ARS	Delayed effects	Genetic effects
2	2	2	2		Yes	77	201	284
1	1	2	2		Provably yes	79	208	234
2	2	2	3		Provably no	195	276	233
2	1	1	1		No	566	232	166
1	1	1	1
2	1	1	2
1	2	4	4
2	4	4	4
1	1	2	2
2	1	1	1
1	1	1	1
1	1	1	2
2	1	1	4
1	1	2	3
1	2	2	4
2	3	3	4
2	1	2	2
1	1	2	1
2	1	1	2
1	1	1	2
2	1	1	2
2	1	3	3
1	1	1	1
2	1	3	2
1	1	2	2
2	1	2	2
1	1	2	3
2	1	2	3
1	1	3	3
1	2	3	2
2	3	3	4
1	1	3	2
2	1	3	3
1	1	1	2
2	2	4	4
1	1	1	1
1	2	2	2
2	2	2	3
1	4	4	3
1	1	1	1
1	1	2	3
2	1	2	1
1	2	3	3
2	1	3	2
1	1	3	3
1	1	3	3
1	1	2	2
2	1	2	2
1	1	4	4
2	1	2	2
2	3	3	3
1	1	2	2
2	1	1	1
2	2	3	3
1	1	2	3
2	1	3	3
2	1	2	3
1	1	2	2
2	3	4	4
2	2	3	3
2	3	3	3
2	2	3	3
1	2	3	3
1	4	4	4
2	4	4	4
1	1	4	4
1	1	1	2
1	1	1	1
1	1	1	2
2	1	1	2
2	1	1	2
1	1	1	1
2	1	1	1
2	1	1	1
1	1	3	3
1	1	3	2
2	2	2	3
2	1	3	2
2	1	4	4
1	1	4	4
1	1	4	4
2	1	4	4
2	1	4	4
1	1	1	1
2	3	3	4
2	1	4	4
1	1	1	3
2	1	3	3
2	1	1	1
1	1	1	1
1	1	2	2
2	1	1	1
2	1	1	1
2	2	3	3
1	2	3	3
2	1	3	2
1	1	3	4
2	3	4	4
1	2	4	4
1	2	2	3
2	3	2	2
1	1	1	3
1	3	3	3
2	1	1	1
2	1	1	1
1	1	1	1
2	3	4	4
1	3	4	4
1	1	3	4
2	1	1	1
1	3	4	4
2	2	4	4
1	1	2	3
2	2	3	3
1	4	4	4
2	1	4	4
1	3	4	4
2	1	4	3
1	4	4	4
2	4	4	4
1	3	3	4
1	1	2	4
1	1	1	1
1	1	2	2
2	1	3	2
2	2	4	4
1	3	4	3
1	2	3	3
2	2	2	2
2	1	2	4
1	2	2	4
1	1	1	1
2	1	1	1
1	1	1	1
2	2	2	2
2	1	1	1
2	1	3	2
2	1	1	3
1	1	1	1
1	1	2	4
2	2	1	4
1	4	4	4
2	2	2	3
1	3	3	3
1	2	3	3
1	1	3	4
2	1	1	1
1	1	3	3
1	1	1	1
2	1	1	1
1	1	1	1
2	1	1	1
2	1	1	1
2	1	1	2
1	1	1	2
2	1	1	1
1	2	2	4
2	1	3	3
2	2	2	2
1	1	1	3
2	1	1	3
2	3	3	3
2	2	2	3
1	1	2	2
2	1	3	4
2	2	3	3
1	1	2	2
2	2	3	3
1	1	1	1
1	1	1	2
2	1	1	3
1	2	3	3
2	3	4	4
2	1	2	4
1	2	2	3
1	1	2	2
2	1	1	3
1	3	3	4
2	3	3	4
1	1	3	2
1	3	2	4
2	1	3	4
1	1	2	2
2	1	2	2
1	1	1	1
2	1	1	1
2	1	1	1
1	1	1	1
2	1	1	1
1	1	2	2
2	1	3	3
2	1	1	2
2	1	1	1
2	1	1	2
1	1	1	2
1	1	4	4
2	1	2	3
1	1	1	1
1	1	1	1
2	1	1	1
2	1	1	1
1	1	2	2
2	1	1	1
1	1	4	4
1	1	1	1
2	1	1	1
2	1	1	1
1	1	1	2
2	1	1	1
1	3	4	4
2	2	3	3
2	3	3	3
2	2	2	4
2	2	2	2
1	1	2	2
2	1	3	4
1	1	1	1
1	1	2	2
2	1	1	1
2	1	2	2
2	1	3	4
2	1	3	3
1	1	3	3
2	2	4	4
1	2	4	4
2	1	2	3
1	1	1	1
1	1	2	2
1	1	1	1
2	1	1	1
2	2	3	3
2	2	3	3
1	1	1	1
2	1	2	2
1	1	1	1
2	1	1	1
1	1	4	4
2	1	1	1
2	1	1	3
1	2	3	3
2	2	3	3
2	1	2	3
1	1	2	3
2	1	4	4
1	1	3	4
2	1	3	3
2	1	1	3
1	1	1	2
2	1	2	2
1	1	2	3
2	1	3	3
2	3	3	4
1	4	4	4
2	3	4	4
1	1	3	4
2	2	2	2
1	1	3	4
2	1	4	4
1	1	2	2
1	1	1	1
2	1	2	2
1	1	3	4
2	3	4	4
2	4	4	4
1	2	2	4
2	1	2	4
2	1	3	3
1	4	4	4
2	1	4	3
1	1	2	2
1	1	3	3
2	1	3	3
1	1	2	3
2	1	3	4
2	1	2	4
1	1	4	3
2	3	3	3
1	2	3	2
1	2	4	4
2	1	4	3
2	1	1	3
2	1	2	3
2	3	3	4
1	2	4	4
2	2	4	4
2	2	3	4
1	2	2	2
1	1	2	2
1	2	2	2
2	1	4	3
1	1	1	1
1	4	4	4
2	1	3	3
1	1	2	1
2	1	1	2
2	1	3	3
1	3	2	2
2	3	3	3
2	1	2	2
2	4	4	4
2	1	2	2
1	1	3	3
1	1	4	4
2	4	4	4
1	1	1	2
1	1	2	2
2	1	2	2
2	1	2	2
1	2	4	4
2	2	4	4
2	2	4	4
1	1	2	2
2	1	2	2
1	1	2	2
1	1	1	1
2	1	2	2
2	1	1	1
1	1	4	4
2	1	2	3
1	4	4	4
2	2	2	3
2	2	4	2
1	1	2	2
1	1	1	1
2	1	4	4
1	2	2	2
2	2	2	2
2	1	1	1
2	2	2	2
1	1	1	1
2	1	1	1
1	1	1	2
2	4	4	4
1	1	1	1
1	1	3	3
2	2	2	4
1	2	3	3
2	1	1	1
1	1	2	2
2	1	2	2
1	1	3	3
1	1	1	1
1	3	2	3
2	2	2	2
2	1	4	4
2	1	2	3
2	1	3	3
2	1	2	3
1	2	3	3
1	1	2	2
2	2	2	2
1	1	3	4
2	1	3	4
1	2	2	2
2	2	2	2
1	1	2	3
2	1	3	4
1	1	1	3
2	2	3	3
1	1	1	1
2	1	1	1
1	1	1	1
2	3	4	3
1	1	1	1
1	1	1	2
1	1	1	1
2	1	1	1
2	1	4	4
2	1	3	3
2	1	4	4
1	2	4	4
1	1	4	1
2	1	4	1
2	1	2	3
1	1	1	2
1	2	2	3
1	1	2	2
2	1	2	4
2	1	3	4
1	1	2	2
2	1	1	2
2	1	3	3
2	2	4	4
1	1	1	1
1	2	3	4
2	3	4	4
2	1	1	3
1	2	2	2
2	2	3	2
1	1	1	2
2	1	2	2
2	1	2	3
1	1	1	1
1	1	1	1
2	1	1	2
2	1	1	1
1	1	1	1
1	1	1	1
1	1	1	1
2	1	1	1
1	1	3	4
2	2	3	4
2	1	2	2
2	1	1	2
1	2	2	1
1	1	1	1
2	1	1	1
1	1	3	3
2	1	1	1
2	1	1	4
1	1	3	3
1	1	4	4
2	4	1	4
1	1	1	1
2	1	1	1
1	4	4	4
1	2	4	4
2	2	4	4
1	3	3	4
2	2	3	4
1	1	1	1
2	1	1	1
1	1	1	1
2	2	2	3
1	2	4	4
1	2	2	2
2	4	4	4
1	3	4	4
1	1	1	2
2	4	4	4
1	3	3	2
2	2	4	4
1	1	1	1
2	1	3	4
2	3	4	4
1	2	3	2
2	2	4	4
1	2	3	3
2	2	3	3
2	1	1	1
1	1	2	3
2	1	2	3
2	1	2	2
1	1	2	2
2	1	2	2
1	1	4	4
2	1	2	2
2	1	2	2
2	1	2	2
1	1	3	2
1	1	2	2
2	1	2	4
2	2	2	2
1	3	3	3
2	3	3	3
1	2	4	2
2	2	2	2
1	4	4	4
2	4	4	4
2	4	4	4
2	4	4	4
1	4	4	4
2	4	4	4
2	2	4	4
1	4	4	4
2	1	4	4
2	2	3	4
1	1	1	1
2	2	3	3
1	2	2	3
1	2	3	3
2	1	2	3
1	4	4	4
2	3	3	4
2	2	2	3
1	2	3	4
1	2	3	4
2	2	4	4
1	3	3	3
2	2	3	3
2	3	3	3
1	2	3	3
2	1	1	1
1	1	2	3
2	1	2	3
2	2	4	4
2	1	1	1
1	1	3	2
2	1	1	1
1	1	1	1
1	2	2	2
1	1	1	2
1	2	3	4
2	3	3	3
2	2	3	3
1	2	2	2
1	4	4	4
2	4	4	4
2	1	3	3
2	1	1	2
2	1	2	4
1	1	2	3
1	1	3	2
1	1	3	3
2	1	3	2
1	4	4	4
1	4	4	4
2	1	2	3
2	2	3	3
1	1	3	3
2	1	3	4
1	4	4	4
2	4	4	4
2	4	4	4
2	1	4	4
1	2	2	4
1	1	3	4
2	2	2	3
1	1	3	4
1	1	1	2
2	1	1	1
1	1	1	1
2	1	1	3
1	1	2	3
2	1	1	2
1	2	2	2
2	2	3	3
2	2	3	2
2	2	3	3
2	2	3	3
2	1	4	4
1	1	4	4
1	3	3	4
2	3	3	4
1	1	3	3
2	4	4	4
2	1	4	4
2	2	4	4
2	1	3	3
2	1	1	1
2	2	4	3
1	1	1	1
2	1	2	2
1	2	3	3
1	3	4	4
2	3	2	2
1	1	2	2
2	2	2	2
2	1	3	2
2	1	2	2
1	1	3	4
2	1	2	4
1	1	3	2
2	1	2	2
1	1	4	4
2	1	3	3
2	1	2	2
1	1	1	1
2	1	2	2
1	1	1	1
1	1	2	3
1	1	1	1
1	1	1	1
1	2	3	4
2	3	3	3
2	2	4	4
1	3	4	4
2	1	4	4
2	1	2	2
1	1	2	2
1	1	2	3
2	1	1	1
1	2	2	4
2	1	4	4
1	1	1	1
2	1	1	3
1	2	4	4
2	1	2	2
1	1	2	2
2	1	1	1
1	1	1	1
1	1	1	2
1	1	2	3
1	1	1	2
1	1	2	2
1	1	3	4
2	1	3	3
1	2	4	3
2	1	1	1
1	2	3	4
1	4	4	3
2	2	4	4
2	4	3	4
2	4	3	4
1	4	3	4
2	2	4	3
2	1	1	2
1	1	2	2
2	3	3	4
1	3	4	4
1	1	2	2
2	2	4	3
1	1	1	1
2	2	2	2
1	1	2	2
2	1	2	2
2	4	4	4
1	1	1	1
2	1	1	1
2	1	3	3
1	1	2	3
2	1	2	3
1	1	2	2
2	1	2	2
1	1	3	3
2	1	3	3
2	2	4	4
1	1	2	4
2	1	2	4
2	2	3	4
1	2	2	2
2	1	1	1
1	2	3	3
2	2	2	2
1	2	2	2
1	4	4	4
1	1	2	2
2	1	2	2
1	3	3	3
1	2	4	4
2	3	3	4
2	4	4	4
1	2	2	2
1	3	4	4
2	3	4	4
2	1	1	4
1	1	1	3
2	1	2	1
1	1	3	4
2	1	4	4
1	2	2	3
2	2	2	3
2	1	3	2
1	1	3	2
2	4	4	4
1	4	4	4
2	3	4	4
1	3	3	4
1	1	2	2
2	1	1	1
1	1	2	2
1	1	2	2
1	1	1	1
1	1	2	2
1	1	2	2
1	1	2	2
2	2	2	2
1	2	2	2
1	1	4	4
2	1	2	3
1	1	2	4
1	1	1	3
2	2	2	2
1	2	2	2
1	2	2	2
1	1	2	2
2	1	2	2
1	1	1	1
1	3	3	4
2	3	4	4
1	4	4	4
2	4	4	4
1	4	4	4
2	4	4	4
1	1	3	3
2	4	4	4
2	1	3	3
1	4	4	4
2	4	4	4
2	3	4	4
1	2	3	3
1	1	3	3
2	2	2	2
2	1	2	2
1	3	3	3
2	1	2	3
2	1	1	1
2	1	2	2
2	1	1	1
2	3	3	3
1	2	4	4
2	1	2	3
2	2	2	4
2	2	2	3
1	2	2	2
2	2	3	3
1	3	3	3
2	1	3	3
1	2	2	2
2	2	3	3
1	2	2	2
1	1	1	2
2	1	1	2
2	1	2	3
2	1	4	4
1	2	2	3
2	2	2	3
2	2	2	2
2	1	2	2
2	1	1	3
1	1	1	1
2	4	4	4
1	4	4	4
1	1	1	1
2	1	1	1
1	1	2	1
2	1	3	3
2	1	3	3
1	2	2	2
2	2	2	2
2	1	4	3
1	2	2	3
2	3	3	4
1	1	1	1
1	1	2	1
2	1	2	1
2	2	2	2
1	1	1	1
2	1	1	1
2	1	2	2
1	1	1	1
2	1	2	2
2	3	4	4
1	1	1	1
1	1	1	2
1	1	2	2
2	1	1	1
2	1	2	2
1	2	3	4
2	1	2	2
2	1	1	3
1	1	1	1
2	1	1	2
2	1	1	1
1	1	1	1
2	1	1	1
1	1	3	4
2	1	3	2
1	1	1	1
2	1	1	1
1	2	2	2
2	3	3	2
2	2	2	2
2	3	4	3
1	4	3	4
2	4	4	4
1	2	3	4
2	2	4	4
2	1	2	3
2	1	2	2
1	1	1	2
1	3	2	4
2	4	2	4
1	1	1	2
2	1	2	2
1	1	2	3
1	2	2	2
1	1	2	3
1	4	4	4
2	4	4	4
1	4	4	4
2	1	2	2
1	1	2	3
1	2	3	3
2	1	2	2
2	3	3	3
1	2	2	2
1	4	4	4
2	1	4	4
1	4	4	4
2	4	4	4
1	1	2	3
2	2	3	3
2	3	3	3
2	4	3	4
1	3	4	3
2	3	3	3
1	2	3	3
2	4	3	2
1	3	3	4
2	1	3	3
2	1	4	3
1	1	3	3
2	1	4	4
1	1	2	3
2	3	3	3
1	1	3	3
2	1	3	3
1	1	2	4
2	1	4	4
1	1	1	3
2	1	1	3
1	1	2	3
2	2	2	2
1	3	2	4
1	1	1	1
1	2	3	4
1	1	4	4
2	1	4	3
2	1	2	2
2	2	1	4
1	1	4	4
2	1	1	1
1	1	2	2
2	2	2	2
2	1	2	3
2	1	3	2
2	2	2	2
2	1	1	1
1	1	1	1
2	1	1	1
2	1	3	3
2	1	1	1
1	1	1	1
2	1	1	1
1	2	4	3
2	1	4	4
2	2	4	4
2	1	4	4
1	1	1	1
1	1	1	4
2	1	3	3
1	1	2	1
2	1	2	2
1	1	4	4
2	2	2	4
2	1	1	2
2	1	1	1
1	1	4	4
2	1	4	4
1	2	4	4
2	1	4	4
1	1	4	4
2	1	4	4
1	2	4	4
1	2	2	2
1	1	2	2
2	2	2	2
1	1	1	2
1	1	1	3
2	1	1	2
1	1	2	2
2	1	4	4
2	1	1	1
1	1	1	1
2	1	1	1
1	1	1	1
1	1	2	1
2	1	3	4
1	3	4	4
2	1	4	4
1	1	1	1
2	1	1	1
1	4	4	4
2	2	2	3
2	1	1	2
2	1	2	3
1	1	2	2
1	1	1	1
1	1	2	3
2	1	1	2
1	1	1	1
2	1	1	1
2	1	2	2
1	1	1	4
2	2	2	2
1	1	1	2
1	2	2	2
2	2	2	2
2	2	2	3
2	1	2	2
1	1	1	1
1	2	4	4
2	1	3	4
2	1	1	1
1	1	3	3
2	1	3	3
1	4	3	3
1	1	2	3
2	1	2	2
1	2	3	4
2	2	3	3
2	1	1	2
2	1	1	2
2	3	4	3
2	1	1	1
2	1	1	2
1	1	1	1
1	1	1	1
2	2	2	2
2	1	2	2
1	1	3	3
2	1	1	2
2	2	2	2
1	2	3	2
1	1	2	2
2	1	2	3
1	3	3	3
1	2	2	3
2	2	3	3
1	1	4	4
1	3	4	4
2	4	4	4
2	2	4	4
1	2	2	2
2	2	2	2
2	1	1	1
2	2	3	3
2	4	4	4
1	4	4	4
2	1	2	2
2	1	1	1
1	1	1	1
2	1	1	1
1	1	2	2
2	1	2	3
1	1	4	4
2	1	4	4
1	4	4	4
2	4	4	4
1	4	4	4
2	1	1	1
1	1	1	1
2	1	3	3
1	1	1	4
2	2	3	4
2	1	3	4
1	2	4	4
2	1	1	2
2	2	2	2
2	1	1	1
1	1	1	1
2	4	4	4
1	4	2	4
2	1	1	3
2	1	2	4
1	1	3	3
2	1	3	3
1	2	2	2
2	1	1	1
2	1	3	3
2	2	2	3
2	4	4	4
1	2	3	4
2	2	4	4
1	1	2	2
2	1	1	1
1	1	2	2
2	1	2	2
1	1	2	3
2	1	1	2
1	1	2	4
2	1	2	3
2	1	1	1
1	1	3	3
1	1	3	3
2	2	4	2
1	1	3	3
2	1	3	4
2	2	4	4
2	4	4	4
1	2	2	2
2	1	3	2
1	1	2	3
2	2	2	1
2	1	2	2
2	1	3	4
2	1	3	3
2	1	1	1
1	1	1	1
2	3	3	4
1	1	4	3
1	1	2	3
2	4	4	4
1	1	2	2
1	3	3	4
2	4	4	4
1	2	3	4
2	1	1	2
1	1	2	2
1	1	4	4
2	1	1	2
1	2	3	4
1	1	2	2
2	2	2	2
1	2	4	4
2	2	4	4
2	3	4	4
1	4	4	4
2	1	2	3
1	1	1	1
2	1	2	2
2	1	1	2
1	1	1	1

## Sheet: vs Goto(≥65y)
sex	Hypertension	Diabetes mellitus	Hyperlipidemia	Stroke	Age		Kawauchi				Goto
1	1	1	1	1	65		N	177			Ｎ	943
1	1	2	1	2	67
1	2	1	1	1	67		Average age	75.5085			Average age	74.2884
2	2	1	2	1	68		SD	7.00857			SD	6.42631
1	1	1	1	1	70		<13	147	83.0508		<13	936	99.2577
1	2	1	1	2	73		≥13	30	16.9492		≥13	7	0.742312
1	1	1	1	1	75
1	2	1	2	1	75		Male	81			Male	345
1	1	1	1	1	79		Female	96			Female	598
1	2	1	1	1	79
2	2	1	1	1	79			No	Yes			No	Yes
2	1	2	1	1	80		Hypertension	54	123		Hypertension	490	453
2	2	1	1	1	80		Diabetes mellitus	137	40		Diabetes mellitus	876	67
2	1	2	1	1	91		Hyperlipidemia	102	75		Hyperlipidemia	729	214
2	1	1	1	1	91		Stroke	162	15		Stroke	908	35
1	2	1	1	1	72		Smorkinｇ	164	13		Smorkinｇ	883	60
1	2	1	2	1	73		Drinking	116	61		Drinking	706	237
1	1	1	1	1	66		Feelings about sleep satisfaction	100	77		Feelings about sleep satisfaction	202	741
1	2	1	2	1	67
1	2	1	1	1	70
2	1	1	2	1	73
1	2	1	2	1	65
1	1	2	1	1	71
2	2	2	2	1	83
1	1	1	1	1	67
2	2	2	2	1	78
1	1	1	1	1	83
2	2	1	1	1	70
2	1	1	2	1	77
2	2	1	1	1	68
1	2	2	2	1	78
1	1	1	1	1	68
2	2	1	2	1	76
2	2	2	1	1	80
2	2	1	1	1	81
2	2	1	1	1	72
2	1	1	1	1	84
2	2	1	2	1	83
2	2	1	2	1	87
1	2	2	2	1	90
1	2	2	2	1	68
2	1	1	2	1	68
2	1	1	1	1	69
1	1	1	1	2	80
1	2	2	1	1	68
2	1	1	1	1	77
1	1	1	1	1	80
2	1	1	1	1	78
1	1	1	1	1	66
2	2	1	1	1	72
2	1	1	1	1	84
1	2	1	2	1	74
1	2	1	1	2	80
1	2	1	2	1	82
2	2	1	1	1	66
2	2	1	1	1	66
2	2	1	1	1	69
2	2	1	2	1	74
2	1	1	1	1	88
1	2	1	2	1	66
2	2	2	2	1	66
1	2	1	1	1	78
2	1	1	1	1	75
1	2	1	1	2	75
2	1	1	1	1	74
2	1	1	2	1	68
1	2	1	1	1	71
1	2	2	2	1	81
1	2	2	2	1	74
1	1	1	1	1	82
2	2	1	1	1	87
2	1	1	1	1	75
1	2	2	2	1	75
2	2	2	2	1	78
2	2	1	1	1	79
2	2	1	2	1	78
2	2	2	2	1	66
1	1	1	1	1	94
2	2	1	1	1	74
2	2	1	1	1	72
2	1	1	1	1	72
2	1	1	2	1	69
2	2	1	2	1	84
1	2	2	2	1	73
1	1	1	1	1	70
1	2	1	1	1	67
2	2	2	2	1	67
2	2	2	2	1	84
2	2	1	2	1	71
1	2	1	2	1	72
1	2	2	1	1	65
1	2	2	2	1	72
1	2	1	1	1	79
2	1	1	1	1	81
2	2	1	1	1	67
1	2	2	2	1	78
1	2	1	1	1	77
2	2	1	1	1	76
1	1	1	1	1	68
1	1	1	2	1	69
2	1	1	2	1	67
2	1	1	1	1	70
1	2	1	1	1	71
2	2	1	2	1	77
1	2	1	1	1	70
1	2	1	1	1	81
2	2	1	2	1	77
1	1	2	1	1	84
2	2	1	1	1	75
2	2	1	2	1	77
1	2	1	1	1	73
2	2	1	2	1	84
1	2	1	2	1	81
2	2	1	1	1	79
2	1	1	1	1	73
2	2	1	1	1	85
1	2	1	2	1	82
2	2	1	2	1	79
1	2	1	1	1	85
2	2	1	1	2	90
2	2	1	2	1	73
1	2	1	1	1	91
1	2	1	1	2	85
2	2	1	2	1	70
2	2	1	1	1	79
1	2	1	2	1	87
2	2	1	1	1	75
1	2	2	2	1	73
1	2	2	2	1	82
1	2	2	2	2	83
1	2	2	1	1	67
2	2	1	2	1	67
2	1	1	2	1	73
1	2	1	1	1	75
2	2	1	1	1	74
2	2	1	1	1	93
2	2	2	2	2	88
2	2	1	1	1	65
2	2	1	2	1	79
1	1	1	1	1	66
1	2	2	2	1	75
2	2	2	2	2	68
2	2	1	1	1	71
2	1	1	1	1	70
2	1	2	2	1	73
2	2	1	1	1	81
2	2	2	2	1	70
2	2	1	1	1	72
1	2	1	1	1	94
1	1	1	1	1	83
2	2	1	1	1	85
2	1	1	1	1	81
1	2	1	1	1	85
1	2	1	2	1	71
1	2	2	2	1	78
1	1	1	1	1	82
1	1	1	1	1	66
1	2	2	2	1	76
2	2	1	2	1	81
2	2	1	1	1	85
2	1	1	2	1	65
1	2	2	2	1	66
2	2	1	2	1	74
1	2	1	2	1	68
2	2	1	2	1	73
2	1	1	1	1	76
2	2	2	2	1	76
2	2	1	1	1	73
1	1	2	2	2	79
2	2	1	2	1	70
1	1	1	1	1	69
2	2	1	1	1	72
2	1	1	2	2	79
1	2	2	1	2	68
1	2	2	2	2	73
2	2	1	1	2	86
2	2	1	2	1	67

## Sheet: Logistic
age	sex	Subjective feeling about health	Anorexia	Feelings about sleep satisfaction	Hyperactivity	Smorking	Drinking	K6	PCL
0	1	0	1	1	1	1	1	0	0
0	0	0	1	1	1	0	1	0	0
0	0	0	1	1	1	0	1	0	0
0	1	0	1	1	1	1	0	0	1
0	0	0	1	0	1	0	1	0	0
0	1	0	1	0	1	1	0	0	0
0	1	0	1	1	1	0	0	0	0
0	1	0	1	1	1	0	0	0	0
0	1	0	1	0	1	1	1	0	0
0	1	0	1	1	1	0	1	0	0
0	0	0	1	1	1	0	0	0	0
0	1	0	1	1	0	1	1	0	0
0	1	0	1	0	1	1	1	0	0
0	1	0	1	1	1	1	0	1	1
0	1	1	1	1	1	1	1	0	1
0	0	0	1	0	1	1	1	0	0
0	1	0	1	1	1	1	0	0	0
0	1	0	1	0	1	1	0	0	0
0	0	0	1	1	1	1	0	0	0
0	1	0	1	0	1	1	0	0	0
0	0	0	1	1	0	0	1	0	0
0	1	0	1	1	1	1	1	0	0
0	1	0	1	1	1	1	1	0	0
0	1	0	1	1	0	1	0	0	0
0	1	0	1	1	1	0	0	0	0
0	1	0	1	1	0	0	0	0	1
0	0	0	1	1	1	0	1	1	1
0	0	0	1	1	1	0	1	0	0
0	1	0	1	0	1	1	0	0	0
0	0	0	1	1	1	1	1	0	0
0	0	0	1	0	1	0	1	0	0
0	0	0	1	0	1	0	0	0	0
0	1	0	1	1	1	1	1	0	0
0	1	0	1	1	0	1	1	0	0
0	1	0	1	1	1	1	0	1	0
0	1	1	1	1	0	1	1	0	0
0	0	0	1	1	1	0	0	0	0
0	1	0	1	0	1	1	0	0	0
0	1	0	1	0	1	1	0	0	0
0	0	0	1	1	1	1	0	0	0
0	1	0	1	0	1	1	1	0	0
0	0	0	1	1	0	0	0	0	1
0	0	0	1	0	1	1	0	0	0
0	0	0	1	1	1	0	0	0	0
0	0	0	1	1	1	1	0	0	0
0	0	0	1	1	0	1	1	0	0
0	0	0	1	1	1	0	1	0	0
0	1	0	1	1	1	1	1	0	0
0	1	0	1	1	0	1	1	0	1
0	0	0	1	0	1	0	0	0	0
0	0	0	1	1	1	0	1	0	0
0	0	0	1	1	1	0	0	0	0
0	1	0	1	1	1	1	1	0	0
0	1	1	1	0	1	1	0	0	0
0	1	0	1	1	1	1	0	0	0
0	1	0	1	1	0	0	1	1	1
0	0	0	1	0	1	1	1	0	0
0	1	0	1	1	1	0	2	0	0
0	1	0	1	1	0	1	1	0	0
0	1	0	1	0	1	1	0	0	0
0	1	0	1	1	1	1	1	0	0
0	0	1	1	1	1	1	1	0	0
0	1	1	1	1	0	1	1	1	1
0	0	0	1	1	1	1	0	1	1
0	0	0	1	1	1	1	0	0	0
0	1	0	1	0	1	1	2	0	0
0	1	1	1	1	0	1	1	1	1
0	1	1	1	1	0	1	2	1	1
0	0	0	1	0	1	1	0	0	0
0	0	0	1	0	1	0	0	0	0
0	1	0	1	0	1	1	0	0	0
0	1	0	1	0	1	1	1	0	0
0	0	0	1	1	1	0	0	0	0
0	0	0	1	1	0	0	0	0	0
0	1	0	1	1	0	1	1	0	1
0	0	0	1	1	0	1	0	0	0
0	0	0	1	1	1	1	0	0	0
0	0	1	1	1	0	1	1	0	0
0	1	0	1	1	1	0	1	0	1
0	1	0	1	1	1	1	1	0	0
0	1	0	1	1	1	1	1	0	0
0	1	0	1	1	1	1	0	0	0
0	1	0	1	1	0	1	0	0	0
0	1	0	1	1	0	1	0	1	0
0	1	1	1	1	0	0	1	1	1
0	0	0	1	1	1	1	0	1	1
0	1	0	1	0	1	1	1	0	0
0	1	0	1	0	1	1	1	0	0
0	1	0	1	0	1	1	1	0	0
0	1	0	1	1	1	1	1	1	0
0	1	0	1	1	1	0	0	0	0
0	0	0	1	0	0	0	0	0	0
0	0	0	1	0	1	1	0	0	0
0	1	1	1	1	0	1	1	0	0
0	1	0	1	1	1	1	0	0	1
0	1	1	1	1	0	1	0	0	1
0	1	1	1	1	0	1	0	1	1
0	0	0	1	0	1	0	0	0	0
0	0	0	1	0	1	0	1	0	0
0	0	0	1	0	1	0	0	0	0
0	0	0	1	1	1	0	0	0	0
0	0	0	1	1	0	0	0	0	0
0	1	0	1	0	1	1	1	0	0
0	0	0	1	1	1	1	0	0	0
0	1	0	1	1	0	1	0	1	1
0	0	0	1	1	0	1	0	0	0
0	1	0	1	0	1	1	1	0	0
0	1	0	1	1	1	1	1	0	0
0	1	0	1	0	1	1	0	0	0
0	1	0	1	1	0	1	0	0	0
0	0	0	1	1	0	1	1	1	0
0	0	0	1	1	1	1	0	0	0
0	0	0	1	1	1	1	0	0	0
0	1	0	1	0	1	1	1	0	0
0	0	0	1	1	0	1	0	0	0
0	1	0	1	1	1	1	1	0	0
0	0	0	1	1	1	0	1	0	0
0	0	0	1	0	1	1	0	0	0
0	0	0	1	0	0	0	0	0	0
0	0	0	1	1	1	0	0	0	0
0	1	0	1	1	0	1	0	0	0
0	0	0	1	1	0	1	0	0	0
0	1	0	1	1	1	1	0	0	0
0	0	0	1	0	1	0	0	0	0
0	0	0	1	0	1	1	0	0	0
0	0	0	1	1	1	0	0	0	0
0	1	0	1	1	1	0	0	0	0
0	1	0	1	1	1	1	1	0	0
0	1	0	1	1	1	1	0	0	1
0	0	1	1	1	0	1	0	0	1
0	0	0	1	0	1	1	0	0	0
0	1	0	1	0	1	1	1	0	0
0	1	0	1	1	1	1	0	0	0
0	1	0	1	0	1	0	0	0	0
0	0	0	1	1	1	0	0	0	0
0	1	0	1	1	0	1	1	0	0
0	0	0	1	0	1	0	0	0	0
0	0	0	1	0	1	1	0	0	0
0	1	0	1	1	0	1	1	0	0
0	1	0	1	1	0	1	1	0	0
0	0	0	1	0	1	1	0	0	0
0	0	0	1	0	1	1	1	0	0
0	0	0	1	0	1	0	0	0	0
0	0	0	1	1	1	0	2	0	0
0	1	0	1	1	1	1	1	0	0
0	0	0	1	0	1	0	0	0	0
0	0	0	1	1	1	1	0	0	0
0	0	0	1	0	1	0	0	0	0
0	1	0	1	1	1	1	1	0	0
0	1	0	1	1	1	1	1	0	0
0	0	0	1	1	1	0	0	0	0
0	0	0	1	0	1	0	0	0	0
0	1	0	1	0	1	1	0	0	0
0	1	0	1	0	1	0	1	0	0
0	0	0	1	0	1	1	2	0	0
0	1	1	1	1	0	1	1	1	1
0	1	0	1	0	1	1	1	0	0
0	0	0	1	0	1	0	0	0	0
0	1	0	1	1	1	1	1	0	0
0	1	0	1	0	1	1	1	0	0
0	1	0	1	1	1	1	1	0	0
0	0	1	1	1	0	1	1	0	0
0	0	0	1	1	1	1	0	0	0
0	1	1	1	1	1	1	1	0	0
0	1	0	1	1	0	1	1	0	0
0	1	1	1	1	0	1	1	1	1
0	0	0	1	1	1	0	0	0	0
0	0	0	1	0	1	0	0	0	0
0	1	1	1	0	1	1	1	0	0
0	0	0	1	0	1	1	0	0	0
0	0	1	1	1	1	1	0	0	0
0	1	0	1	0	1	1	1	0	0
0	1	0	1	0	1	1	1	0	0
0	1	0	1	0	1	1	1	0	0
0	1	0	1	1	1	1	1	0	0
0	0	0	1	1	0	0	1	0	0
0	0	0	1	1	0	0	0	1	0
0	1	0	1	1	1	1	1	0	0
0	0	0	1	1	0	0	0	1	1
0	1	0	1	1	0	1	0	0	1
0	0	0	1	0	1	1	0	0	0
0	0	0	1	0	1	1	0	0	0
0	0	0	1	0	1	0	0	0	0
0	0	0	1	1	1	0	0	0	0
0	0	0	1	0	1	1	0	0	0
0	0	0	1	1	1	1	0	0	0
0	1	0	1	1	1	1	0	0	0
0	0	0	1	0	1	1	0	0	0
0	1	0	1	1	0	1	1	0	0
0	1	0	1	0	1	1	1	0	0
0	0	1	1	1	0	0	0	0	0
0	0	1	1	1	0	0	0	0	0
0	1	0	1	1	1	1	1	0	0
0	0	1	1	1	0	0	1	0	1
0	1	0	1	0	1	0	0	0	1
0	0	0	1	1	1	1	1	0	1
0	0	0	1	0	1	0	2	0	0
0	0	0	1	0	1	1	0	0	0
0	1	1	1	1	0	1	1	0	0
0	0	0	1	1	0	1	0	0	0
0	0	0	1	0	1	0	1	0	0
0	0	0	1	0	1	0	0	0	0
0	1	0	1	0	1	1	0	0	0
0	0	0	1	0	1	1	0	0	0
0	1	0	1	1	1	1	0	0	1
0	1	1	1	1	0	1	1	1	1
0	0	0	1	0	0	0	1	0	1
0	1	0	1	1	0	1	1	1	1
0	0	0	1	0	1	0	0	0	0
0	0	0	1	0	1	0	0	0	0
0	0	1	1	0	1	0	0	0	0
0	0	0	1	0	1	1	0	0	0
0	0	0	1	0	1	0	1	0	0
0	0	0	1	1	1	1	0	0	0
0	1	0	1	1	1	1	1	0	0
0	0	0	1	0	0	1	1	0	0
0	0	0	1	1	0	0	0	0	0
0	1	1	1	1	0	1	1	0	1
0	0	0	1	0	1	0	1	0	0
0	0	0	1	1	1	0	0	0	0
0	0	0	1	0	1	0	1	0	0
0	0	0	1	0	1	1	2	0	0
0	1	0	1	1	1	1	1	0	0
0	1	0	1	1	1	1	1	0	0
0	0	1	1	1	0	0	0	1	0
0	0	0	1	1	1	0	0	0	0
0	0	1	1	1	0	0	0	0	0
0	1	0	1	1	0	1	1	0	1
0	1	0	1	0	1	1	1	0	0
0	1	0	1	0	1	1	1	0	0
0	0	0	1	0	1	1	1	0	0
0	1	1	1	1	0	1	1	0	0
0	0	0	1	1	1	0	1	0	0
0	1	0	1	1	0	1	1	0	0
0	1	0	1	1	1	1	0	0	0
0	1	0	1	1	1	1	1	0	0
0	1	0	1	1	1	1	1	0	0
0	1	1	1	1	1	1	1	0	0
0	0	0	1	0	1	0	0	0	0
0	0	0	1	1	1	1	0	0	0
0	0	0	1	0	1	1	1	0	1
0	0	0	1	0	1	1	0	0	0
0	0	0	1	1	1	1	0	0	0
0	0	0	1	0	1	1	0	0	0
0	0	0	1	0	1	1	1	0	0
0	0	0	1	0	1	1	0	0	0
0	1	0	1	1	1	1	1	0	0
0	1	0	1	1	1	1	1	0	0
0	1	0	1	1	1	1	1	0	0
0	1	0	1	1	1	1	1	0	0
0	0	0	1	1	1	1	0	0	0
0	0	0	1	1	1	1	0	0	0
0	1	0	1	1	1	1	1	0	0
0	0	0	1	1	0	0	0	0	0
0	0	0	1	1	1	0	0	1	1
0	1	1	1	1	0	1	1	1	1
0	1	1	1	1	0	1	0	1	1
0	1	0	1	0	1	0	1	0	0
0	1	0	1	0	1	1	1	0	0
0	1	0	1	0	1	1	1	0	0
0	1	0	1	0	1	1	1	0	0
0	1	0	1	1	1	1	1	0	0
0	0	0	1	1	1	1	0	0	0
0	0	0	1	0	1	1	1	0	0
0	0	0	1	1	0	1	0	0	0
0	1	0	1	1	0	1	1	0	0
0	1	0	1	1	1	1	1	0	0
0	1	0	1	1	1	1	0	0	0
0	0	1	1	1	0	1	0	0	0
0	0	1	1	0	1	1	2	0	0
0	0	0	1	1	1	0	0	0	0
0	0	0	1	0	1	1	0	0	0
0	0	0	1	1	1	1	0	0	0
0	0	0	1	1	1	1	0	0	1
0	1	1	1	1	0	1	1	0	1
0	1	1	1	1	0	1	0	0	1
0	1	1	1	1	0	0	1	1	1
0	1	0	1	1	1	1	1	0	1
0	1	0	1	1	0	1	0	1	1
0	0	0	1	1	1	0	0	0	0
0	0	0	1	0	1	1	0	0	0
0	0	0	1	0	1	1	1	0	0
0	1	0	1	0	1	1	1	1	0
0	1	0	1	1	1	1	1	0	0
0	1	1	1	1	0	0	0	0	0
0	1	0	1	0	1	0	0	0	0
0	1	1	1	1	0	1	1	0	0
0	1	0	1	1	1	1	1	0	0
0	1	0	1	1	0	1	1	0	0
0	1	0	1	1	1	1	1	0	0
0	0	0	1	0	1	1	0	0	0
0	1	0	1	1	0	0	0	0	0
0	1	1	1	1	0	1	1	0	1
0	1	0	1	1	0	1	0	0	1
0	0	0	1	0	1	0	0	0	0
0	0	0	1	1	1	0	1	0	0
0	0	0	1	0	1	1	1	0	0
0	0	0	1	0	1	1	0	0	0
0	1	0	1	0	1	1	1	0	0
0	0	0	1	1	1	1	1	0	0
0	1	0	1	0	1	1	1	0	0
0	0	0	1	0	1	0	0	0	0
0	0	0	1	0	0	1	0	0	0
0	0	0	1	1	1	1	0	0	0
0	1	0	1	0	1	1	1	0	0
0	1	0	1	1	1	1	1	0	0
0	1	1	1	1	0	1	0	0	0
0	0	0	1	0	0	0	1	0	0
0	0	0	1	0	1	1	1	0	0
0	0	0	1	1	1	0	0	0	0
0	0	1	1	1	1	1	0	0	0
0	1	0	1	1	1	1	1	0	0
0	1	0	1	1	0	1	0	0	0
0	0	0	1	0	1	0	0	0	0
0	1	0	1	0	1	1	1	0	0
0	1	0	1	1	1	1	0	0	1
0	0	1	1	1	0	1	0	1	1
0	1	1	1	1	0	1	1	1	1
0	1	0	1	0	1	1	1	0	0
0	0	0	1	0	1	1	0	0	0
0	0	0	1	0	1	0	0	0	0
0	0	0	1	0	1	1	0	0	0
0	0	0	1	1	1	1	1	0	0
0	1	0	1	0	1	1	1	0	0
0	0	0	1	0	1	1	0	0	0
0	1	0	1	0	1	1	1	0	0
0	1	0	1	0	1	1	1	0	0
0	0	0	1	1	1	0	0	0	0
0	0	0	1	1	1	1	2	0	0
0	1	1	1	1	0	1	1	0	0
0	1	0	1	0	1	1	1	1	1
0	1	0	1	1	1	1	1	0	0
0	0	0	1	0	1	1	1	0	0
0	1	0	1	0	1	1	1	0	0
0	0	0	1	0	1	0	0	0	0
0	0	0	1	1	1	0	1	0	0
0	1	0	1	1	1	1	1	0	0
0	0	0	1	1	1	1	0	0	1
0	0	0	1	1	0	0	0	0	1
0	0	0	1	0	1	0	0	0	0
0	1	0	1	1	1	1	1	0	0
0	0	0	1	1	0	1	0	0	0
0	1	0	1	1	1	1	0	0	0
0	0	1	1	0	0	1	1	0	0
0	0	1	1	1	1	0	1	1	0
0	1	0	1	1	0	1	0	0	0
0	0	0	1	1	0	1	1	0	1
0	0	0	1	1	0	1	0	0	1
0	0	0	0	1	0	1	0	0	1
0	1	1	0	1	0	1	1	0	0
0	0	1	0	1	0	0	1	1	1
0	1	0	0	0	0	1	1	0	0
0	0	1	0	1	0	1	0	0	0
0	0	0	0	1	1	1	0	0	0
0	1	0	0	0	0	0	0	0	1
0	1	0	0	1	0	1	1	0	0
0	1	1	0	1	1	1	1	0	0
0	0	0	0	1	1	0	0	0	1
0	0	0	0	1	0	0	0	1	1
0	1	1	0	1	1	1	1	1	1
0	0	1	0	1	0	1	1	0	0
0	0	0	0	1	0	0	0	1	1
0	0	1	0	1	0	0	1	1	1
0	0	1	0	1	0	1	1	1	0
0	1	1	0	1	0	1	1	0	1
1	0	0	1	0	1	0	1	0	0
1	0	0	1	0	1	1	1	0	0
1	0	0	1	0	1	1	1	0	0
1	1	0	1	0	1	1	1	0	0
1	0	0	1	0	1	0	1	0	0
1	0	0	1	0	1	1	2	0	0
1	0	0	1	0	1	1	0	0	0
1	1	0	1	0	1	1	1	0	0
1	0	0	1	0	1	1	0	0	0
1	1	0	1	0	0	1	1	0	0
1	1	0	1	0	1	0	1	0	0
1	0	0	1	0	1	1	2	0	0
1	1	0	1	0	1	1	0	0	0
1	0	0	1	0	1	0	0	0	0
1	1	0	1	1	0	1	1	0	0
1	0	0	1	1	1	1	0	0	0
1	0	0	1	1	1	1	0	0	0
1	1	0	1	0	0	1	1	0	0
1	0	0	1	0	1	1	0	0	0
1	0	0	1	1	1	1	1	0	0
1	0	0	1	1	1	1	0	0	0
1	0	0	1	0	1	1	0	0	0
1	0	0	1	1	1	1	0	0	0
1	1	1	1	1	1	1	1	0	0
1	1	0	1	0	1	1	1	0	0
1	0	0	1	0	1	0	0	0	0
1	0	0	1	0	1	1	1	0	0
1	1	1	1	0	1	1	1	0	0
1	1	0	1	1	0	1	1	0	0
1	1	0	1	0	1	1	1	0	0
1	0	0	1	0	0	0	0	0	0
1	1	0	1	0	1	1	1	0	0
1	1	0	1	0	1	1	1	0	0
1	1	0	1	1	1	1	1	0	0
1	0	0	1	1	1	1	1	0	0
1	1	0	1	0	1	1	1	0	0
1	1	0	1	1	1	1	1	0	0
1	1	0	1	0	1	1	1	0	0
1	1	0	0	1	1	1	1	0	0
1	0	0	1	0	1	1	0	0	0
1	0	0	1	0	1	0	0	0	0
1	1	0	1	0	1	1	1	0	0
1	1	0	1	0	1	1	1	0	0
1	0	1	1	1	0	1	2	0	0
1	0	0	1	0	1	1	0	0	0
1	1	0	1	1	1	1	1	0	0
1	0	1	1	1	0	1	1	0	0
1	1	0	1	0	1	1	1	0	0
1	0	0	1	1	0	1	1	0	0
1	1	0	1	0	1	1	1	0	0
1	1	0	1	0	1	1	0	0	0
1	0	0	1	0	1	1	1	0	0
1	0	0	1	0	1	1	0	0	0
1	0	1	1	1	0	1	0	0	0
1	1	0	1	0	1	1	1	0	0
1	1	1	1	0	1	1	1	0	0
1	1	1	1	1	1	1	1	0	0
1	1	0	1	1	1	1	0	0	0
1	1	0	1	1	0	1	1	0	0
1	0	0	1	1	1	1	1	0	0
1	0	0	1	0	1	1	0	0	0
1	1	0	1	0	1	1	1	0	0
1	1	0	1	0	1	1	1	0	0
1	0	0	1	0	1	0	0	0	0
1	1	0	1	0	1	1	0	0	0
1	1	0	1	1	0	1	1	0	0
1	0	0	1	0	1	0	0	0	0
1	0	0	1	1	1	1	1	0	0
1	0	0	1	1	1	1	1	0	0
1	1	0	1	1	1	1	1	0	0
1	0	0	1	1	1	0	1	0	0
1	1	0	1	0	1	1	1	0	0
1	0	0	1	1	1	1	1	0	0
1	1	0	1	0	1	1	1	0	0
1	1	1	1	1	1	1	1	0	0
1	1	0	1	0	0	1	1	0	0
1	1	0	1	0	0	1	1	0	0
1	0	0	1	0	1	1	0	0	0
1	1	0	1	1	0	1	0	0	0
1	1	0	1	1	1	1	1	0	0
1	1	0	1	1	1	1	1	1	0
1	1	0	1	1	1	1	0	0	0
1	1	1	1	0	1	1	1	0	0
1	0	0	1	0	1	1	0	0	0
1	0	0	1	1	1	0	1	1	0
1	0	0	1	0	1	1	0	0	0
1	1	0	1	0	1	1	1	0	0
1	1	1	1	1	0	1	0	0	0
1	1	0	1	0	1	1	1	0	0
1	0	0	1	0	1	1	0	0	0
1	0	0	1	1	0	1	0	0	0
1	0	1	0	1	1	1	1	0	0
1	0	0	1	1	0	1	0	0	0
1	1	0	1	1	1	1	0	0	0
1	1	0	1	1	1	1	1	0	0
1	0	0	1	0	1	1	0	0	0
1	0	0	1	0	1	1	1	0	0
1	1	0	1	0	1	1	1	0	0
1	0	0	1	1	1	1	0	0	0
1	0	0	1	0	1	1	2	0	0
1	1	0	1	1	1	1	1	0	0
1	1	0	1	1	1	1	0	0	0
1	0	0	1	1	0	1	0	0	0
1	1	1	0	1	0	1	1	0	0
1	0	0	1	0	1	1	0	1	0
1	0	0	1	1	0	1	1	0	0
1	1	0	1	1	1	1	1	0	0
1	0	1	1	0	1	1	0	0	0
1	1	0	1	1	1	1	1	0	0
1	1	1	1	1	0	1	1	0	0
1	0	1	1	1	0	1	0	0	0
1	1	1	1	1	0	1	1	0	0
1	0	0	1	1	0	1	1	0	0
1	1	1	0	1	0	1	1	0	0
1	1	0	1	1	1	0	1	0	0
1	1	1	0	1	0	1	1	0	0
1	0	1	1	0	0	1	1	0	0
1	1	0	1	0	0	1	1	0	0
1	0	0	0	0	0	0	0	0	0
1	1	0	1	1	0	1	1	0	0
1	1	0	1	0	1	1	1	0	0
1	0	0	1	1	0	1	0	0	0
1	0	1	1	0	1	1	2	1	0
1	1	1	1	1	1	1	1	1	0
1	1	1	0	1	0	1	1	0	0
1	0	0	1	0	0	1	1	0	0
1	1	0	1	1	1	1	1	0	1
1	0	1	1	1	1	1	0	0	1
1	0	1	1	1	0	1	1	1	1
1	0	1	1	1	0	1	0	0	1
1	0	0	1	0	1	1	1	0	1
1	1	1	1	1	0	1	0	1	1
1	1	0	1	1	0	1	1	0	1
1	0	0	1	1	1	1	0	0	1
1	1	1	1	1	1	1	0	0	1
1	1	0	0	1	1	1	1	0	1
1	1	0	1	1	0	1	1	0	1
1	1	1	1	1	0	1	1	1	1
1	1	1	1	1	0	1	0	1	1
1	0	0	1	1	0	1	0	1	1
1	0	0	1	0	1	1	1	0	1
1	1	1	0	1	0	1	1	0	1
1	1	1	1	1	1	1	1	0	1
1	1	0	1	0	1	1	1	0	1
1	1	0	1	0	1	1	1	0	1
1	1	1	1	1	0	1	1	0	1
1	1	1	0	1	0	1	1	1	1
1	1	1	0	1	0	1	1	1	1
1	0	1	1	1	0	1	1	1	1
1	0	0	1	1	0	1	1	1	1
1	1	1	1	1	0	1	0	1	1
1	1	1	0	1	0	1	1	1	1
1	0	1	1	1	0	1	1	0	1
1	0	0	1	1	0	1	0	0	1
1	0	1	0	1	0	1	0	1	1
1	0	1	0	1	0	1	2	1	1
1	0	1	1	1	0	1	2	1	1
1	0	0	1	0	1	1	0	0	1
1	1	1	1	1	0	1	1	0	1
1	1	1	1	1	0	1	1	1	1
1	1	1	1	1	0	1	0	1	1
1	0	0	1	1	0	1	0	0	1
1	1	1	0	1	0	1	1	1	1
1	0	1	1	1	0	1	0	0	1
1	1	1	0	1	0	1	0	1	1
1	1	0	0	1	0	1	1	1	1
1	1	0	1	0	0	1	1	0	1
1	1	0	1	0	1	1	1	0	1
1	0	1	1	1	0	1	0	1	1
1	1	1	1	1	0	1	1	0	1
1	0	1	1	1	0	1	2	1	1
1	1	1	1	1	0	1	1	0	1
1	1	1	0	1	0	1	1	1	1
1	0	0	1	1	0	1	0	1	1
1	0	0	1	0	1	1	0	0	1
1	1	1	0	1	0	1	1	1	1
1	1	0	1	0	0	1	0	1	1
